# Supplementary material
Source: Elsevier journal article supplement (https://researchonline.lshtm.ac.uk/333661/1/mmc1.pdf)
Supplement: mmc1 [file mmc1.pdf]

# THE LANCET

## **Supplementary appendix**

This appendix formed part of the original submission and has been peer reviewed. We post it as supplied by the authors.

Supplement to: The Interleukin-6 Receptor Mendelian Randomisation Analysis (IL6R MR) Consortium. The interleukin-6 receptor as a target for prevention of coronary heart disease: a mendelian randomisation analysis. *Lancet* 2012; published online March 14. DOI:10.1016/S0140-6736(12)60110-X.

# The interleukin-6 receptor as a target for treatment of coronary heart disease: a randomised controlled trial

## Supplementary Material

### Supplementary methods

#### Treatment trials and other studies of tocilizumab

We restricted the main analysis to RCTs comparing tocilizumab treatment (4mg/kg or 8mg/kg) with placebo, with or without background treatment using other anti-inflammatory or immunosuppressive interventions. We also investigated the association between tocilizumab treatment and CRP concentration in non-randomised cohort studies.

#### Genetic studies

Study characteristics of genetic studies included in the analysis are detailed in **Supplementary table 1**. The studies from which individual participant data were included in the present analyses are listed below, and include 26 prospective studies, four randomised cardiovascular prevention trials, two cross-sectional studies, eight retrospective case-control studies.

##### *Prospective cohort studies*

Twenty-five prospective studies contributed genotypic and phenotypic data, and their design is described elsewhere.

From the UCL-LSHTM-Edinburgh-Bristol (UCLEB) Consortium:

British Regional Heart Study (BRHS)<sup>1</sup>, the British Women's Heart and Health Study (BWHHS)<sup>2</sup>, the Caerphilly Prospective Study (CaPS)<sup>3</sup>, the Edinburgh Artery Study (EAS)<sup>4</sup>, the English Longitudinal Study of Aging (ELSA)<sup>5</sup>, the Edinburgh Type 2 Diabetes Study (ET2DS)<sup>6</sup>, the Northwick Park Heart Study II (NPHS-II)<sup>7</sup>, the Whitehall-II (WHII) study<sup>8</sup>, and the MRC National Study of Health and Development (1946 Birth Cohort, MRC NSHD)<sup>9</sup>.

From the National Heart, Lung and Blood Institute (NHLBI) Candidate Gene Association Resource (CARE) Consortium<sup>10</sup>: the Atherosclerosis Risk in Communities Study (ARIC)<sup>11</sup>, the Coronary Artery Risk

Development in Young Adults (CARDIA)<sup>12</sup>, the Cleveland Family Study (CFS)<sup>13,14</sup>, the Cardiovascular Health Study (CHS)<sup>15</sup>, the Framingham Heart Study (FHS)<sup>16</sup>, and the Multi-Ethnic Study of Atherosclerosis (MESA)<sup>17</sup>.

From the Health, Alcohol and Psychosocial factors In Eastern Europe (HAPIEE) study<sup>18</sup>: the Czech Republic (HAPIEE-CZ), Lithuania (HAPIEE-LT), Poland (HAPIEE-PL) and Russia (HAPIEE-RU) arms of the study.

Also, the MRC Ely Cohort<sup>19</sup>(40), the MRC Fenland Cohort (2 samples)<sup>20</sup>, the IMPROVE study<sup>21</sup>, the Prevention of Renal and Vascular Endstage Disease study (PREVEND)<sup>22</sup>, the Second Manifestations of Arterial Disease (SMART) Study<sup>23</sup>, the InCHIANTI study<sup>24</sup> and the MedStar study<sup>25</sup>.

Three RCT studies were included - the Aspirin in Asymptomatic Atherosclerosis (AAA) trial<sup>26</sup>, the PROSPER trial follow-up study<sup>27</sup>, and the Thrombosis Prevention Trial follow-up study (TPT)<sup>28</sup>. These trials were treated as prospective cohorts for the purposes of these analyses.

#### *Case-control, case-cohort and cross-sectional studies*

Four nested case-control studies were included - the EPIC-Netherlands study (EPIC-NL)<sup>29</sup>, the EPIC-Norfolk study (EPIC-N, case-cohort design)<sup>30</sup>, the Utrecht Cardiovascular Pharmacogenetics study (UCP)<sup>31</sup> and the Women's Health Initiative (WHI)<sup>32</sup>.

Two cross-sectional studies of diabetes were included - the Ealing Diabetes Study (EDS)<sup>33</sup> and the UCL Diabetes and Cardiovascular Study (UDACS)<sup>34</sup>.

Four case-control and case-cohort studies contributed data: i) the Hypercoagulability and Impaired Fibrinolytic function Mechanisms (HIFMECH) study<sup>35</sup> included recent survivors of first myocardial infarction (MI) and age-matched healthy control;

ii) The Ischemic Stroke Genetics Study-Siblings With Ischaemic Stroke (ISGS-SWISS) consortium, a case-control GWAS study of ischaemic stroke<sup>36,37</sup>;

iii) the Colorectal Tumour Gene Identification study (CORGI)<sup>38</sup>; and

iv) the Colorectal Cancer Genetics Study (COGS) - both GWA studies, contributed data on colorectal cancer.

Further details of these studies are given in **Supplementary table 1**.

*Genome-wide association studies and other cohorts contributing published, summary data*

Thirteen published GWA studies contributed look-up data to the analyses. The GerMIFS II study<sup>39</sup>, the INTERHEART study<sup>40</sup>, the ISIS study<sup>41,42</sup>, the LOLIPOP study<sup>43</sup>, the PROCARDIS study<sup>44</sup>, the Wellcome Trust Case-Control Collaboration<sup>45</sup>, the British Breast Cancer Study<sup>46</sup>, the Cancer Genetic Markers of Susceptibility study<sup>47</sup>, the Nurses' Health Study, the National Cancer Research Network, Mammography, Oestrogens and Growth Factors study, the Colorectal Tumour Gene Identification study (CORGI)<sup>38</sup>, and the MRC British 1958 Birth Cohort<sup>48</sup> contributed 13574 aggregated breast cancer cases and 14852 controls<sup>49</sup>.

**Phenotypic measures**

*Demographic, anthropometric and biomarker variables*

Blood lipid fractions evaluated as primary biomarker outcomes were total, LDL- and HDL-cholesterol and triglycerides. Availability of data for biomarkers in the primary analysis is detailed in **Supplementary Table 2**. All biomarkers were measured using validated assays and protocols reported previously. Biomarker measurements were taken from either the baseline phase of each study or from the next phase soonest after baseline at which data on the greatest number of biomarkers were available. Where key biomarkers were unavailable at the principal survey phase their data were included from the chronologically closest available phase. Continuous variables that were not normally distributed were log<sub>e</sub> transformed to achieve normality, and all biomarkers were converted to common units of measurement. Levels of LDL were not measured directly in some studies (HAPIEE-RU and CaPS) and were therefore calculated from data on total and HDL-cholesterol and triglyceride levels using the Friedewald formula<sup>50</sup>.

Where data for LDL-, HDL- and total cholesterol were available in units of mg/dL, they were converted to mmol/L using a multiplication factor of 0.02586. Triglyceride units were similarly converted using a factor of 0.01129.

We also estimated *IL6R* SNP associations with haemoglobin, platelet count and hepatic enzyme levels that have also been reported to be altered by tocilizumab treatment<sup>9,10,24–26</sup>.

*Clinical outcome reporting*

Since event definitions differed between collaborating studies, common definitions were set to accommodate data from as many cohorts as possible. Several studies reported validated events (using case-note data or

similar), but others recorded only self-reported events. We included all events in the analysis - self-reported and validated - since self-reported data was the lowest common denominator between studies (**Supplementary Table 3**). Where possible, only validated self-reported events were included. The primary outcome (all fatal and non-fatal CHD events) included acute myocardial infarction (MI), coronary artery bypass grafting or other coronary revascularisation, but not angina pectoris. Where World Health Organisation International Classification of Disease (ICD) codes were available, fatal CHD events included ICD-10 codes I-21, I-22, I-23, I-24 and I-25, and ICD-9 codes 410.0 to 410.9. Stroke of all aetiology (including haemorrhagic and ischaemic events) was included. Fatal stroke events included ICD-10 codes I-61 to I-64, I-67 and I-69, and ICD-9 codes 430.0 to 434.9.

Where data allowed, only the first recorded cardiovascular event (of any type) was included and all subsequent events excluded from the analysis. Prevalent events were defined as those occurring prior to study baseline and incident events as any event occurring during follow-up.

### **SNP selection**

We aimed to compile the smallest set of variants to yield the most data on effects of *IL6R* genotype and therefore act as the most robust instruments for variation in the gene. A number of open-access populations of European ancestry were searched via the Genome Variation Server and the International HapMap Project (Release 23a/Phase 3)<sup>51</sup> for SNP within and 20kbp up- and downstream of *IL6R*. Using HaploView<sup>52</sup> and existing genotype data from Whitehall II we identified tagging SNPs present on the IBC HumanCVD BeadChip v2 (Cardiochip). SNPs were included on the HumanCVD BeadChip (Cardiochip) platform array - a candidate gene-based SNP array including a high density of markers in nearly 2,000 genes implicated in CVD - in part for their ability to tag genetic variation at this locus. Of those included on Cardiochip, we excluded SNPs whose associated p-value for univariate linear regression of circulating log<sub>e</sub> IL-6 levels on genotype conducted using PLINK in Whitehall II participants was greater than  $p=1 \times 10^{-5}$  in an additive model. For each SNP we also assessed the beta-coefficient for the above linear regression model and the minor allele frequency in Whitehall II and the HapMap CEU samples. Using data from the 1000 Genomes Project Pilot 1, we evaluated linkage disequilibrium (LD) between each of the resulting shortlisted SNPs and between those and SNPs identified by previous genome-wide association studies of quantitative traits, giving preference to SNPs capturing data for previously identified SNPs or multiple IL-6-associated SNPs in Whitehall II. Where possible we excluded SNPs

in strong LD ( $r^2 > 0.9$ ) to assemble the final subset of SNPs for genotyping across the collaborating studies. The consequence and function of each selected SNP was assessed using HapMap, NCBI SNP database (<http://www.ncbi.gov.uk/snp>), Ensembl (<http://www.ensembl.org>), UCSC Genome Browser<sup>53</sup>.

### **Genotyping and genotype data quality control**

Genotypes were coded as 0, 1 or 2 homozygous common allele, heterozygous and homozygous minor allele respectively.

We included existing genotype data where available and commissioned new genotyping where necessary.

Studies used a variety of genotyping platforms including: the ITMAT/Broad Institute CARE Consortium HumanCVD BeadChip ('Cardiochip')<sup>54</sup>; Illumina MetaboChip, Illumina 550k v1/3 and 610/660K (Illumina, San Diego CA, USA); Affymetrix GeneChip Human Mapping 500K and Affymetrix Genome-Wide Human SNP Array 6.0 (Affymetrix, Santa Clara, CA, USA); the ABI TaqMan (Applied Biosystems, Foster City, CA, USA); or KASPar (KBiosciences, Hoddesdon, UK) [add other collaborator platforms].

### **Statistical analysis**

#### *Participant inclusion criteria*

We restricted the analysis to unrelated individuals with available data for genotype at the lead SNP (or one of its proxies), and for at least one biomarker or clinical outcome.

#### *Relatedness*

Where study family structure was recorded, in each group of related participants all but the eldest of the group were excluded from the analyses.

#### *SNP associations with continuous risk factors and circulating biomarkers*

Analyses were based on an additive genetic model justified on the basis of the association of the three *IL6R* SNPs including rs7529229 (the most widely typed of these SNPs across all studies) with the circulating concentration of IL-6. Weighted mean difference between genotypes was calculated using the 'metan' command in Stata v 11.2, applying inverse-variance weighted fixed effects meta-analysis to the mean of each biomarker by genotype. Using the common homozygous group as a reference, the difference between the reference and

heterozygous and rare homozygous groups was estimated. Where biomarkers were  $\log_e$  transformed, the proportional difference between geometric means was calculated. Linear regression models (using the 'regress' command in Stata and equivalent procedures in other analysis packages) were used to estimate differences (and 95% confidence intervals, CI) in biomarkers per additional minor allele possessed at each SNP. For biomarkers that had been  $\log_e$  transformed, the beta-coefficient from such a regression model was exponentiated to find the proportional difference in geometric means associated with possession of each additional minor allele. Within study estimates of per-allele effects were combined using Mantel-Haenszel fixed effects meta-analysis.

#### *Subgroup analyses*

SNP associations with continuous biomarkers and with clinical outcomes were analysed with stratification by the following subgroups: males, females, individuals aged <55 years, 56-65 years and >65 years; individuals with and without CVD at the time of biomarker measurement; those with and without type-2 diabetes mellitus; users and non-users of lipid-lowering drugs; individuals with 10 year Framingham CHD risk of above and below 20%; individuals stratified by tertiles of non-HDL-cholesterol; body mass index <25kg/m<sup>2</sup>, 25-30kg/m<sup>2</sup> and >30kg/m<sup>2</sup>; genotyping platforms and study designs. Tests of interaction between subgroups were performed using the chi-squared test for heterogeneity within the 'metan' command in Stata.

#### *SNP associations with clinical outcomes*

We estimated for each disease endpoint the odds ratio (OR) and 95% CI per minor allele for each SNP (rs7529229, rs4845371, rs12740969) under an additive model, as above, where data were available. Per-allele odds ratios were calculated by logistic regression models (using the 'logit' command in Stata) and resulting odds ratios combined using inverse-variance weighted fixed effects meta-analysis to derive a summary estimate (the 'metan' command in Stata v11.1). These analyses included only studies where at least one case and one control for the relevant outcome were available. Sensitivity analysis using different genetic models (heterozygous vs. common allele homozygous, and minor allele homozygous vs. common allele homozygous) were also conducted (data available on request).

In studies where all participants were diabetic, individuals free of diabetes from EAS were used as controls for ET2DS and from Whitehall-II for EDSC and UDACS when calculating odds ratios by logistic regression with type 2 diabetes as the outcome.

## **Systematic review of treatment trials and other investigations of tocilizumab**

### *Search strategy*

We searched PubMed on 7 September 2010 using the keyword “tocilizumab” and supplemented this by a search of reference lists of existing reviews and a systematic review of tocilizumab treatment published by the Cochrane Collaboration<sup>55</sup>.

### *Data extraction and analysis*

Data were extracted by MVH and information extracted from a random selection of eligible studies was checked by DIS. CRP was selected as a biomarker by which the magnitude of tocilizumab's treatment effect could be indexed since it was the most widely reported at the greatest number of treatment doses and time-points for which data were available in the genetic studies. For continuous variables other than CRP, the difference from baseline in the active arm was compared to the difference in baseline of placebo for 8mg/kg vs. placebo RCT only. The most parsimonious time-points were chosen to maximise data yield across studies and also to prevent studies from being represented twice. For CRP, values were extracted for RCTs and cohort studies investigating 4mg/kg, 8mg/kg or 16mg/kg TCZ versus placebo at 8-12 weeks following initial treatment. For RCT, the difference in CRP from baseline in the intervention arm was compared to that of the difference in the placebo group. For cohort studies, only the difference between baseline and follow-up was compared (as there was no comparator arm). We abstracted data for all clinically relevant biomarkers and safety endpoints. Trial results were combined with Mantel-Haenszel (binary traits) and inverse variance (continuous traits) fixed effects meta-analysis performed using Stata 11.2 (StataCorp, Texas, USA).



## Supplementary results

### IL-6, CRP, fibrinogen and blood lipid concentrations

Four studies were conducted exclusively in men (BRHS, CaPS, HIFMECH, and NPHS-II) and two exclusively in women (BWHHS and WHI), all remaining studies contributed participants from both genders (with the proportion of men in the range 18% and 75%).

Study-specific geometric mean concentrations (approximate SD) were in the range 1.01 (0.66) to 3.49 (2.48)pg/ml for IL-6 (17 studies, 29,978 individuals), 0.85 (0.99) to 3.10 (3.49) mg/L for CRP (31 studies, 77,290 individuals) and 1.99 (0.44)g/L to 3.57 (0.77)g/L for fibrinogen (19 studies, 53,480 individuals). Total cholesterol concentration, available in 35 studies (n=119,565) was in the range (mean, SD) 3.71 (1.93) to 7.06 (1.33) mmol/L; LDL-C, available in 30 studies (n=102,107) was in the range 2.19 (1.24) to 4.93 (1.17) mmol/L; HDL-C, available in 32 studies (n=109,688) was in the range 0.84 (0.26) to 1.68 (0.52) mmol/L; non-HDL-C available in 30 studies (n=100,762) was in the range 3.02 (0.87) to 5.61 (1.30) mmol/L; and triglycerides, available in 32 studies (n=109,926) was in the range (geometric mean, approximate SD) 0.76 (0.38) to 4.71 (3.35) mmol/L (**Supplementary Figure 5**).

### SNP selection, quality control & genotype

The Genome Variation Server identified 44 SNPs and the HapMap database 67 SNPs in the region of *IL6R*, of which 26 and 24 respectively passed the MAF threshold of 30%. Of the HapMap variants, 13 were designated tagging SNPs. Of the 42 SNPs in *IL6R* included on the CardioChip, 12 met the p-value threshold of  $p < 1 \times 10^{-5}$  for association with circulating log<sub>e</sub> IL-6 at phase 3 of the Whitehall II study. Strong linkage disequilibrium ( $r^2 > 0.9$ ) was noted between one of the CardioChip SNPs and SNPs identified by GWAS studies for C-reactive protein<sup>56</sup> and soluble IL-6 receptor<sup>57</sup>. Evaluation of effect size (indicated by linear regression beta-coefficient and R<sup>2</sup> values) and linkage disequilibrium between SNPs around the *IL6R* gene (**Supplementary figure 3**) suggested an ultimate subset of 3 SNPs. Of these, 2 (rs7529229 and rs4845371) were located within *IL6R* itself and one (rs12740969) in *TDRD10*, 34kbp from *IL6R*. The latter SNP was selected because it captured information on variation at the 3' end of *IL6R*. Carriage of the minor allele at rs7529229 resulted in higher circulating levels of IL-6, whilst the minor alleles at rs4845371 and rs12740969 were associated with lower IL-6 levels.

### Association of additional *IL6R* SNPs with inflammatory biomarkers

The associations of the other *IL6R* SNPs (rs4845371, rs12740969) with IL-6, CRP and fibrinogen were consistent with but opposite in direction to the findings for the rs7529229 variant (**Supplementary figure 8**).

#### **Reporting of *IL6R* variants associated with safety endpoints.**

The NHGRI catalogue of genome-wide association studies lists 8 GWA studies of colorectal cancer (searched 14 April 2011) and 12 GWA studies of prostate cancer (searched 18 April 2011) of which none reported variants in *IL6R* in either main or supplementary results. Of the 16 GWA studies of breast cancer (searched 15 April 2011), one study reported SNPs in *IL6R* though there was no association of those with cancer<sup>58</sup> (**Figure 4**).

#### **Association of *IL6R* variants with CHD events**

Estimates for the association of the *IL6R* variant with risk of CHD were consistent between the present *de novo* analysis and previously published case-control study data for the rs4537545 variant in LD ( $r^2=1.0$  in the HapMap CEU sample) with rs7529229<sup>1</sup> (**Figure 3**).

**Supplementary Tables**

- 1- Collaborating study characteristics
- 2 - Data availability for biomarkers & events across studies
- 3 - Clinical event definitions
- 4 - Published associations of *IL6R* variants with biomarkers and non-cardiovascular outcomes
- 5 - Genotyping platforms and QC metrics, genotype frequency across studies
- 6 - SNPs within 55kb of *IL6R* on the Cardiochip platform and their associations with log IL-6 in the Whitehall II study
- 7 - Safety endpoints in trials of tocilizumab therapy  
"
- 8 - Associations of the functional *IL6R* rs8192284 variant with IL-6, CRP and fibrinogen concentrations in the Whitehall II study

Supplementary Table 1 - Collaborating study characteristics

| Study name                      | Study design    | Geographical location | Sampling frame     | Participants included | Baseline year(s) | % Male | Age (Mean ,SD) |
|---------------------------------|-----------------|-----------------------|--------------------|-----------------------|------------------|--------|----------------|
| <i>Present genetic analysis</i> |                 |                       |                    |                       |                  |        |                |
| AAA                             | RCT             | UK                    | General practice   | 2,359                 | 1998-2001        | 29     | 61.9 (6.6)     |
| ARIC                            | Cohort          | USA                   | Community          | 9,588                 | 1986             | 47     | 54.3 (2.7)     |
| BRHS                            | Cohort          | UK                    | General practice   | 3,945                 | 1978-1980        | 100    | 68.7 (5.5)     |
| BWHHS                           | Cohort          | UK                    | General practice   | 3,445                 | 1999-2001        | 0      | 69.4 (5.5)     |
| CARDIA                          | Cohort          | USA                   | Community          | 1,443                 | 1984             | 47     | 25.6 (3.4)     |
| CaPS                            | Cohort          | UK                    | Community          | 1404                  | 1984-1988        | 100    | 56.7 (4.4)     |
| CFS                             | Cohort          | USA                   | Community (family) | 135                   | 1995             | 59     | 53.9 (14.7)    |
| CHS                             | Cohort          | USA                   | Community          | 3,952                 | 1989             | 45     | 70.4 (5.3)     |
| COGS                            | Case-control    | UK                    | Clinic             | 1905                  | n/a              | 47     | n/a            |
| CORGI                           | Case-control    | UK                    | Population         | 1978                  | n/a              | 51     | 51.0 (5.9)*    |
| EAS                             | Cohort          | UK                    | General practices  | 917                   | 1987             | 51     | 64.3 (5.6)     |
| EDS                             | Cross-sectional | UK                    | Diabetes clinic    | 319                   | 2001-2003        | 61     | 63.7 (13.7)    |
| ELSA                            | Cohort          | UK                    | HSE respondents    | 5,504                 | 1998, 1999, 2001 | 46     | 61.0 (9.6)     |
| Ely                             | Cohort          | UK                    | General practice   | 1,601                 | 1990-1992        | 47     | 61.1 (9.2)     |
| EPIC-N                          | Nested C-Ct     | UK                    | Community          | 1,690                 | 1993-1997        | 50     | 60.1 (9.0)     |
| EPIC-NL                         | Nested C-Ct     | Netherlands           | Existing cohorts   | 5,194                 | 1993-1997        | 22     | 54.1 (10.1)    |
| ET2DS                           | Cohort          | UK                    | Community (cases)  | 1,069                 | 2006-7           | 51     | 67.9 (4.2)     |
| FHS                             | Cohort          | USA                   | Community          | 1,336                 | 1948/1971/2002   | 47     | 45.7 (10.1)    |
| HAPIEE-CZ                       | Cohort          | Czech Republic        | Population         | 6,685                 | 2002-2005        | 47     | 58.3 (7.1)     |
| HAPIEE-LT                       | Cohort          | Lithuania             | Population         | 6,887                 | 2002-2005        | 45     | 61.0 (7.6)     |
| HAPIEE-PL                       | Cohort          | Poland                | Population         | 8,716                 | 2002-2005        | 49     | 57.7 (7.0)     |
| HAPIEE-RU                       | Cohort          | Russia                | Population         | 7,082                 | 2002-2005        | 46     | 58.9 (7.1)     |
| HIFMECH                         | Case-control    | Europe                | Cases/community    | 1,096                 | n/a              | 100    | 51.7 (5.5)     |
| IMPROVE                         | Cohort          | Europe                | Clinic             | 3,465                 | 2003             | 48     | 64.2 (5.4)     |
| InCHIANTI                       | Cohort          | Italy                 | Community          | 1,199                 | 1998             | 44.8   | 68.4 (0.5)     |
| ISGS-SWISS                      | Case-control    | USA                   | Hospital/community | 2,558                 | 2001             | 52     | 66.1 (13.7)    |
| MedStar                         | Cohort          | USA                   | Clinic             | 866                   | 2004-7           | 67     | 53.5 (10.2)    |
| MESA                            | Cohort          | USA                   | Community          | 2,298                 | 2000             | 48     | 65.7 (10.2)    |
| MRC Fenland - GWAS†             | Cohort          | UK                    | General practices  | 1,376                 | 2004 (ongoing)   | 44     | 45.0 (7.3)     |
| MRC Fenland - Metabochip†       | Cohort          | UK                    | General practices  | 3,059                 | 2004 (ongoing)   | 47     | 47.0 (7.1)     |
| MRC NSHD                        | Birth cohort    | UK                    | Birth register     | 2,402                 | 1946             | 53     | 53 (0)         |
| NPHS-II                         | Cohort          | UK                    | General practices  | 2,755                 | 1989-1994        | 100    | 56.6 (3.4)     |
| PREVEND                         | RCT             | Netherlands           | Community          | 3,867                 | 1997             | 51     | 49.6 (12.5)    |
| PROSPER                         | RCT             | Europe                | Clinic             | 5,244                 | 1997-1999        | 48     | 75.3 (3.4)     |
| SMART                           | Cohort          | Netherlands           | Clinic             | 8,026                 | 1996             | 68     | 56.5 (12.4)    |
| TPT                             | RCT             | UK                    | General practice   | 5,085                 | 1984-1989        | 100    | 57.4 (6.7)     |
| UCP                             | Nested C-C      | Netherlands           | Clinic             | 1,632                 | 2007             | 75     | 62.8 (9.6)     |
| UDACS                           | Cross-sectional | UK                    | Diabetes clinic    | 585                   | 2001-2002        | 59     | 66.7 (11.0)    |
| WHI                             | Nested C-C      | USA                   | Community          | 5,723                 | 1994-1998        | 0      | 67.8 (6.7)     |
| Whitehall II                    | Cohort          | UK                    | Workplace          | 5,059                 | 1985-1988        | 74     | 49.2 (6.0)     |
| <i>Published data</i>           |                 |                       |                    |                       |                  |        |                |
| GerMIFS II                      | Case-control    | Germany               | Clinic             | 2,520                 | n/a              | NR     | NR             |
| INTERHEART E                    | Case-control    | International         | Clinic             | 1,691                 | n/a              | NR     | NR             |
| ISIS                            | Case-control    | International         | Clinic             | 3,566                 | n/a              | NR     | NR             |

|                  |              |    |           |       |     |    |    |
|------------------|--------------|----|-----------|-------|-----|----|----|
| <b>LOLIPOP E</b> | Cohort       | UK | Community | 6,657 | n/a | NR | NR |
| <b>PROCARDIS</b> | Case-control | UK | Clinic    | 8,328 | n/a | NR | NR |
| <b>WTCCC</b>     | Case-control | UK | Clinic    | 4,863 | n/a | NR | NR |

*Footnote:*

All cohort studies were prospective

The MRC Fenland Study is a single cohort though was genotyped using two platforms with different individuals in each group and therefore is reported as two distinct samples here.

C-C : case-control; C-Ct: case-cohort; HSE - Health Survey for England

\*Mean age in controls

**Supplementary Table 2 - Data availability for biomarkers & events in studies contributing to the primary genetic analysis**

|                        | Circulating biomarkers |       |            |       |       |       |           | Clinical events (prevalent & incident) |        |          |
|------------------------|------------------------|-------|------------|-------|-------|-------|-----------|----------------------------------------|--------|----------|
|                        | IL-6                   | CRP   | Fibrinogen | TC    | HDL-C | LDL-C | Non-HDL-C | CHD events                             | Stroke | Diabetes |
| AAA                    | -                      | 1,926 | 2,064      | 2,260 | -     | -     | -         | 95                                     | 48     | 48       |
| ARIC                   | 299                    | 7,583 | 9,495      | 9,569 | 9,571 | 9,414 | 9,569     | 1,837                                  | 522    | 1,184    |
| BRHS                   | 2,261                  | 3,863 | 3,865      | 3,853 | 3,742 | 3,761 | 3,739     | 668                                    | 424    | 289      |
| BWHHS                  | 3,257                  | 3,162 | 3,258      | 3,257 | 3,253 | 3,177 | 3,253     | 655                                    | 252    | 458      |
| CARDIA                 | 226                    | 1,315 | 681        | 1,435 | 1,435 | 1,435 | 1,435     | 10                                     | 4      | 99       |
| CaPS                   | 782                    | 949   | 942        | 1,337 | 1,298 | 1,337 | 1,337     | 281                                    | 132    | 119      |
| CFS                    | 39                     | 39    | 36         | 39    | 39    | 38    | 39        | 16                                     | 13     | 17       |
| CHS                    | 3,635                  | 3,923 | 3,917      | 3,942 | 3,937 | -     | 3,937     | 128                                    | 551    | -        |
| EAS                    | 632                    | 654   | 871        | 889   | 884   | 884   | 884       | 312                                    | 123    | 31       |
| EDS                    | -                      | 79    | -          | 305   | 284   | 265   | 281       | 51                                     | 22     | 319      |
| ELSA                   | -                      | 5,433 | 5,401      | 5,436 | 5,434 | 5,292 | 5,434     | -                                      | -      | -        |
| Ely                    | -                      | 624   | -          | 1,600 | 1,598 | 1,597 | 1,598     | -                                      | -      | -        |
| EPIC-N                 | -                      | -     | -          | -     | -     | -     | -         | -                                      | -      | 727      |
| EPIC-NL                | -                      | 4,343 | -          | 4,343 | 3,586 | 4,267 | 3,066     | 1,303                                  | 553    | 1,112    |
| ET2DS                  | 1,031                  | 1,017 | 1,030      | 1,025 | 1,025 |       | 1,025     | 145                                    | 60     | 1,053    |
| FHS                    | 766                    | 314   | 310        | 848   | 847   | 847   | 847       | 159                                    | 64     | 161      |
| HAPIEE-CZ              | -                      | 6,486 | -          | 6,546 | 6,522 | 6,278 | 6,521     | 435                                    | 291    | 351      |
| HAPIEE-LT              | -                      | 915   | -          | 6,872 | 6,754 | 6,689 | 6,754     | 376                                    | 394    | 394      |
| HAPIEE-PL              | -                      | 900   | -          | 8,751 | 8,750 | 8,615 | 8,750     | 737                                    | 206    | 657      |
| HAPIEE-RU              | -                      | 1,019 | -          | 7,083 | 7,081 | 7,079 | 7,081     | 648                                    | 462    | 255      |
| HIFMECH                | 779                    | 1,017 | 988        | 1,013 | -     | -     | -         | 509                                    | 3      | 59       |
| IMPROVE                | -                      | 3,463 | -          | 3,459 | 3,459 | 3,398 | 3,459     | 301                                    | 63     | 858      |
| InCHIANTI              | 1,199                  | -     | -          | -     | -     | -     | -         | -                                      | -      | -        |
| ISGS-SWISS             | -                      | -     | -          | -     | -     | -     | -         | -                                      | 1,070  | -        |
| MedStar                | -                      | -     | -          | -     | -     | -     | -         | 421                                    | -      | -        |
| MESA                   | 2,256                  | 2,289 | 2,288      | 2,293 | 2,291 | 2,261 | 2,291     | 100                                    | 32     | 220      |
| MRC Fenland GWAS       | -                      | 1,328 | -          | 1,373 | 1,373 | 1,364 | 1,373     | -                                      | -      | -        |
| MRC Fenland Metabochip | -                      | -     | -          | 3,052 | 3,052 | 3,027 | 3,052     | -                                      | -      | -        |
| MRC NSHD               | -                      | -     | -          | 2,236 | 2,082 | 2,072 | 2,082     | -                                      | -      | -        |
| NPHS-II                | -                      | 2,210 | 2,653      | 2,646 | 1,776 | 1,678 | 1,763     | 269                                    | 66     | 269      |
| PREVEND                | -                      | 3,664 | -          | 3,842 | 3,784 | 3,702 | 3,763     | 289                                    | 34     | 147      |
| PROSPER                | 5,129                  | 5,154 | 5,103      | 5,243 | 5,242 | 5,241 | 5,242     | 589                                    | 241    | 807      |

|                     |               |               |               |                |                |                |                |       |       |     |
|---------------------|---------------|---------------|---------------|----------------|----------------|----------------|----------------|-------|-------|-----|
| <b>SMART</b>        | -             | 4,465         | -             | 7,979          | 7,973          | 7,535          | 7,971          | -     | -     | -   |
| <b>TPT</b>          | -             | -             | 3,692         | 3,740          | -              | -              | -              | 299   | 72    | -   |
| <b>UCP</b>          | -             | -             | -             | -              | -              | -              | -              | 632   | -     | -   |
| <b>UDACS</b>        | 574           | 570           | -             | 582            | 582            | 565            | 582            | 60    | 39    | 585 |
| <b>WHI</b>          | 4,472         | 4,495         | 4,458         | 4,743          | 4,728          | 4,661          | 4,728          | 2,396 | 1,076 | 281 |
| <b>Whitehall II</b> | 2,501         | 3,328         | 1,615         | 3,014          | 3,018          | 1,526          | 2,954          | 418   | 114   | 336 |
| <b>Total</b>        | <b>29,978</b> | <b>77,290</b> | <b>53,480</b> | <b>119,565</b> | <b>109,688</b> | <b>102,107</b> | <b>100,762</b> |       |       |     |

*Abbreviations:* TC - total cholesterol; HDL-C - high density lipoprotein cholesterol; LDL-C - low density lipoprotein cholesterol

Supplementary Table 3 - Clinical event definitions

|                         | Prevalent CVD events |                 |                        | All CVD events (prevalent & incident) |                 |                        |                   |           | All CHD events (prevalent & incident) |                 |                        |                   |           | All stroke (all aetiology, prevalent & incident) |                 |                                 |                   |           | Diabetes (all aetiology, prevalent & incident) |                 |                        |                   |           |
|-------------------------|----------------------|-----------------|------------------------|---------------------------------------|-----------------|------------------------|-------------------|-----------|---------------------------------------|-----------------|------------------------|-------------------|-----------|--------------------------------------------------|-----------------|---------------------------------|-------------------|-----------|------------------------------------------------|-----------------|------------------------|-------------------|-----------|
|                         | Non-fatal            |                 |                        | Non-fatal                             |                 |                        | Fatal             |           | Non-fatal                             |                 |                        | Fatal             |           | Non-fatal                                        |                 |                                 | Fatal             |           | Non-fatal                                      |                 |                        | Fatal             |           |
|                         | Self report          | Medical records | Clinical/lab. measures | Self report                           | Medical records | Clinical/lab. measures | Death certificate | ICD coded | Self report                           | Medical records | Clinical/lab. measures | Death certificate | ICD coded | Self report                                      | Medical records | Clinical/lab. /imaging measures | Death certificate | ICD coded | Self report                                    | Medical records | Clinical/lab. measures | Death certificate | ICD coded |
| AAA                     | •                    |                 | •                      |                                       | •               |                        | •                 | •         |                                       | •               |                        | •                 | •         |                                                  | •               |                                 | •                 | •         |                                                | •               |                        | •                 | •         |
| ARIC                    |                      | •               |                        |                                       | •               |                        | •                 | •         |                                       | •               |                        | •                 | •         |                                                  | •               |                                 | •                 | •         |                                                | •               |                        | •                 | •         |
| BRHS                    |                      | •               |                        |                                       | •               |                        | •                 | •         |                                       | •               |                        | •                 | •         |                                                  | •               |                                 | •                 | •         |                                                | •               |                        | •                 | •         |
| BWHHS                   |                      | •               |                        | •                                     | •               |                        | •                 | •         | •                                     | •               | •                      | •                 | •         | •                                                | •               | •                               | •                 | •         | •                                              | •               | •                      | -                 | -         |
| CaPS                    | •                    | •               |                        | •                                     | •               |                        | •                 | •         | •                                     | •               | •                      | •                 | •         | •                                                | •               | •                               | •                 | •         | •                                              | •               | •                      | •                 | •         |
| CARDIA                  |                      | •               |                        |                                       | •               |                        | •                 |           |                                       | •               |                        | •                 |           |                                                  | •               |                                 | •                 |           |                                                | •               |                        | •                 |           |
| CFS                     | •                    |                 |                        |                                       |                 | •                      |                   |           | •                                     |                 |                        |                   |           | •                                                |                 |                                 |                   |           |                                                | •               |                        |                   |           |
| CHS                     | •                    |                 |                        | •                                     |                 |                        |                   |           | •                                     |                 |                        |                   |           | •                                                |                 |                                 |                   |           | •                                              |                 |                        |                   |           |
| EAS                     | •                    | •               | •                      | •                                     | •               | •                      | •                 | •         | •                                     | •               | •                      | •                 | •         | •                                                | •               | •                               | •                 | •         | •                                              | •               | •                      | •                 | •         |
| EDS                     | -                    | -               | -                      | •                                     | •               |                        | -                 | -         | •                                     | •               |                        | -                 | -         | •                                                | •               |                                 | -                 | -         |                                                | •               | •                      | -                 | -         |
| ELSA                    | -                    | -               | -                      | -                                     | -               | -                      | -                 | -         | -                                     | -               | -                      | -                 | -         | -                                                | -               | -                               | -                 | -         | -                                              | -               | -                      | -                 | -         |
| Ely                     | -                    | -               | -                      | -                                     | -               | -                      | -                 | -         | -                                     | -               | -                      | -                 | -         | -                                                | -               | -                               | -                 | -         | -                                              | -               | -                      | -                 | -         |
| EPIC-N                  | -                    | -               | -                      | -                                     | -               | -                      | -                 | -         | -                                     | -               | -                      | -                 | -         | -                                                | -               | -                               | -                 | -         | •                                              | •               | •                      | •                 | •         |
| EPIC-NL                 | -                    | -               | -                      |                                       | •               |                        | •                 | •         |                                       | •               |                        | •                 | •         |                                                  | •               |                                 | •                 | •         | •                                              | •               | •                      | •                 | •         |
| ET2DS                   | •                    | •               | •                      | •                                     | •               | •                      | -                 | -         | •                                     | •               | •                      | -                 | -         | •                                                | •               |                                 | -                 | -         | •                                              | •               | -                      | -                 | -         |
| FHS                     |                      | •               |                        |                                       | •               |                        | •                 |           |                                       | •               |                        | •                 |           |                                                  | •               |                                 | •                 |           |                                                | •               |                        | •                 |           |
| HAPIEE-CZ               | •                    |                 |                        | •                                     | •               | •                      | •                 | •         | •                                     | •               | •                      | •                 | •         | •                                                | •               | •                               | •                 | •         | •                                              | •               | •                      | •                 | •         |
| HAPIEE-LT               | •                    |                 |                        | •                                     | •               | •                      | •                 | •         | •                                     | •               | •                      | •                 | •         | •                                                | •               | •                               | •                 | •         | •                                              | •               | •                      | •                 | •         |
| HAPIEE-PL               | •                    |                 |                        | •                                     | •               | •                      | •                 | •         | •                                     | •               | •                      | •                 | •         | •                                                | •               | •                               | •                 | •         | •                                              | •               | •                      | •                 | •         |
| HAPIEE-RU               | •                    |                 |                        | •                                     | •               | •                      | •                 | •         | •                                     | •               | •                      | •                 | •         | •                                                | •               | •                               | •                 | •         | •                                              | •               | •                      | •                 | •         |
| HIFMECH                 |                      | •               | •                      | •                                     | •               |                        | -                 | -         | •                                     | •               |                        | -                 | -         | •                                                |                 |                                 | -                 | -         | •                                              |                 |                        | -                 | -         |
| IMPROVE                 | n/a                  | n/a             | n/a                    | n/a                                   | n/a             | n/a                    | n/a               | n/a       | n/a                                   | n/a             | n/a                    | n/a               | n/a       | n/a                                              | n/a             | n/a                             | n/a               | n/a       | n/a                                            | n/a             | n/a                    | n/a               | n/a       |
| InCHIANTI               | -                    | -               | -                      | -                                     | -               | -                      | -                 | -         | -                                     | -               | -                      | -                 | -         | -                                                | -               | -                               | -                 | -         | -                                              | -               | -                      | -                 | -         |
| ISGS-SWISS              | •                    |                 |                        | •                                     |                 |                        | -                 | -         | •                                     |                 |                        | -                 | -         |                                                  | •               | •                               | •                 |           | -                                              | -               | -                      | -                 | -         |
| MedStar                 | -                    | -               | -                      | -                                     | -               | -                      | -                 | -         |                                       | •               | •                      | -                 | -         | -                                                | -               | -                               | -                 | -         | -                                              | -               | -                      | -                 | -         |
| MESA                    | •                    |                 |                        | •                                     |                 |                        |                   |           | •                                     |                 |                        |                   |           | •                                                |                 |                                 |                   |           | •                                              |                 |                        |                   |           |
| MRC Fenland - GWAS      | -                    | -               | -                      | -                                     | -               | -                      | -                 | -         | -                                     | -               | -                      | -                 | -         | -                                                | -               | -                               | -                 | -         | -                                              | -               | -                      | -                 | -         |
| MRC Fenland -Metabochip | -                    | -               | -                      | -                                     | -               | -                      | -                 | -         | -                                     | -               | -                      | -                 | -         | -                                                | -               | -                               | -                 | -         | -                                              | -               | -                      | -                 | -         |
| MRC NSHD                | -                    | -               | -                      | -                                     | -               | -                      | -                 | -         | -                                     | -               | -                      | -                 | -         | -                                                | -               | -                               | -                 | -         | -                                              | -               | -                      | -                 | -         |
| NPHS-II                 |                      | •               |                        | •                                     | •               |                        | •                 | •         | •                                     | •               |                        | •                 | •         | •                                                | •               | •                               | •                 | •         | •                                              | •               | •                      | •                 | •         |
| PREVEND                 |                      | •               |                        |                                       | •               |                        | •                 | •         |                                       | •               |                        | •                 | •         |                                                  | •               |                                 | •                 | •         |                                                | •               |                        | •                 | •         |



|              |   |   |   |   |   |   |   |   |   |   |   |   |   |   |   |   |   |   |   |   |   |   |   |
|--------------|---|---|---|---|---|---|---|---|---|---|---|---|---|---|---|---|---|---|---|---|---|---|---|
| PROSPER      | - | • | • | - | • | • | • | • | - | • | • | • | • | - | • | • | • | • | - | • | • | • | • |
| SMART        | - | - | - | - | - | - | - | - | - | - | - | - | - | - | - | - | - | - | - | - | - | - | - |
| TPT          |   | • |   |   | • |   | • |   |   | • |   | • |   |   | • |   | • |   |   | • |   | • |   |
| UCP          | - | - | - | - | - | - | - | - |   | • |   |   |   | - | - | - | - | - | - | - | - | - | - |
| UDACS        | - | - | - | • | • |   | - | - | • | • |   | - | - | • | • |   | - | - |   | • | • | - | - |
| WHI          | • |   |   | • |   |   |   |   | • |   |   |   |   | • |   |   |   |   | • |   |   |   |   |
| Whitehall II |   | • |   |   | • |   | - | - |   | • |   | - | - |   | • |   | - | - |   | • | • |   |   |

**Supplementary Table 4** - Published associations of *IL6R* variants with biomarkers and non-cardiovascular outcomes

| Endpoint              | Source                  | GWAS | SNP (minor allele) | Cases/controls (studies) | LD with rs7529229 (r <sup>2</sup> ) <sup>c</sup> | Odds ratio (95% CI) | p-value                    |
|-----------------------|-------------------------|------|--------------------|--------------------------|--------------------------------------------------|---------------------|----------------------------|
| All cancer            | Present studies         | No   | rs75299229 (T)     | 3,828/40,006(10)         | -                                                | 0.98 (0.93 to 1.03) | 0.39                       |
|                       | Published <sup>59</sup> | No   | rs8192284 (C)      | 1,548/17,117 (1)         | 0.97                                             | 1.05 (0.95 to 1.16) | 0.38                       |
|                       | <i>Pooled estimate</i>  |      |                    |                          | <b>5,376/57,123 (11)</b>                         | -                   | <b>0.99 (0.95 to 1.04)</b> |
| Breast cancer         | Present analysis        | Yes  | rs4537545 (A)      | 13,574/14,852 (1)        | 1.00                                             | 1.01 (0.94 to 1.10) | 0.74                       |
|                       | Published <sup>60</sup> | Yes  | rs4537545(A)       | 2,702/5,726 (1)          | 1.00                                             | 0.97 (0.90 to 1.05) | 0.50 <sup>a</sup>          |
|                       | <i>Pooled estimate</i>  |      |                    |                          | <b>14,456/15,758 (2)</b>                         | -                   | <b>1.03 (0.96 to 1.10)</b> |
| Respiratory infection | Published <sup>61</sup> | No   | rs8192284 (C)      | 264/287                  | 0.97                                             |                     | 0.19 <sup>b</sup>          |
| Colorectal cancer     | Present analysis        | No   | rs4537545 (A)      | 1863/1903 (2)            | 1.00                                             | 1.03 (0.96 to 1.12) | 0.40                       |

p-value thresholds for declaration of significance: <sup>a</sup> 1x10<sup>-6</sup>; <sup>b</sup> 0.05;

\* Discovery dataset

† Replication dataset

<sup>c</sup> LD data from 1000 Genomes Pilot 1, assessed using SNP Association and Proxy Search tool (<http://www.broadinstitute.org/mpg/snap/>, accessed 26 June 2011)

Supplementary Table 5 - Genotyping platforms and QC metrics, genotype frequency across studies

| Study                    | Participants | Genotyping platform           | Call rate (%) | Proxy SNP used<br>(LD with rs7529229,<br>r <sup>2</sup> )* | TT (wildtype<br>homozygotes) | TC    | CC (variant<br>homozygotes) | MAF<br>(%)        | Hardy-Weinberg |         |
|--------------------------|--------------|-------------------------------|---------------|------------------------------------------------------------|------------------------------|-------|-----------------------------|-------------------|----------------|---------|
|                          |              |                               |               |                                                            |                              |       |                             |                   | $\chi^2$       | p-value |
| AAA                      | 2,359        | KASPct                        | 96            | -                                                          | 771                          | 1,128 | 369                         | 41.1              | 1.65           | 0.199   |
| ARIC                     | 9,588        | IBC Cardiochip                | 100           | -                                                          | 3,316                        | 4,571 | 1,701                       | 41.6              | 3.34           | 0.067   |
| BRHS                     | 3,945        | KASPar                        | 98            | -                                                          | 1,270                        | 1,889 | 715                         | 42.8              | 0.07           | 0.787   |
| BWHHS                    | 3,445        | IBC Cardiochip                | 100           | -                                                          | 1,143                        | 1,696 | 600                         | 42.1              | 0.46           | 0.498   |
| CaPS                     | 1,404        | KASPar                        | 98            | -                                                          | 479                          | 688   | 267                         | 41.4              | 0.14           | 0.706   |
| CARDIA                   | 1,443        | IBC Cardiochip                | 100           | -                                                          | 500                          | 711   | 231                         | 40.7              | 0.68           | 0.410   |
| CFS                      | 135          | IBC Cardiochip                | 100           | -                                                          | 47                           | 55    | 33                          | 44.8              | 4.20           | 0.040   |
| CHS                      | 3,952        | IBC Cardiochip                | 100           | -                                                          | 1,400                        | 1,895 | 656                         | 40.6              | 0.12           | 0.730   |
| EAS                      | 917          | ABI TaqMan                    | 97            | -                                                          | 314                          | 405   | 171                         | 42.0              | 3.85           | 0.050   |
| EDS                      | 319          | ABI TaqMan                    | 100           | rs8192284 (0.97)                                           | 127                          | 147   | 45                          | 37.2 <sup>1</sup> | 0.06           | 0.814   |
| ELSA                     | 5,504        | KASPar                        | 99            | -                                                          | 1,807                        | 2,646 | 1,015                       | 42.8              | 0.72           | 0.397   |
| Ely                      | 1,601        | Metabochip                    | 100           | rs4129267 (1.00)                                           | 536                          | 765   | 300                         | 42.6              | 0.86           | 0.35    |
| EPIC-N                   | 1,690        | Metabochip                    | 100           | rs4129267 (1.00)                                           | 588                          | 791   | 311                         | 42.0              | 2.45           | 0.12    |
| EPIC-NL                  | 5,194        | IBC Cardiochip                | 97            | -                                                          | 1,916                        | 2,457 | 821                         | 39.5              | 0.51           | 0.475   |
| ET2DS                    | 1,069        | KASPar                        | 99            | -                                                          | 369                          | 512   | 172                         | 40.6 <sup>1</sup> | 0.06           | 0.802   |
| FHS                      | 1,336        | IBC Cardiochip                | 100           | -                                                          | 469                          | 647   | 220                         | 40.7              | 0.02           | 0.901   |
| HAPIEE-CZ                | 6,700        | KASPar                        | 98            | -                                                          | 2,545                        | 3,146 | 1,009                       | 38.5              | 0.52           | 0.47    |
| HAPIEE-LT                | 6,914        | KASPar                        | 99            | -                                                          | 3,106                        | 3,073 | 735                         | 32.9              | 0.38           | 0.54    |
| HAPIEE-PL                | 8,758        | KASPar                        | 99            | -                                                          | 3,399                        | 4,063 | 1,296                       | 38.0              | 2.08           | 0.15    |
| HAPIEE-RU                | 7,085        | KASPar                        | 98            | -                                                          | 3,176                        | 3,111 | 798                         | 33.2              | 0.75           | 0.39    |
| HIFMECH                  | 1,096        | ABI TaqMan                    | 97            | -                                                          | 381                          | 477   | 204                         | 41.7 <sup>2</sup> | 6.14           | 0.013   |
| IMPROVE                  | 3,465        | Metabochip                    | n/a           | rs7518199 (0.97)                                           | 1,377                        | 1,621 | 467                         | 36.9              | 0.09           | 0.77    |
| InCHIANTI                | 1,199        | Illumina 550k                 | >98           | rs4129267 (1.00)                                           | 457                          | 589   | 164                         | 37.9              | 1.42           | 0.23    |
| ISGS-SWISS               | 2,558        | Illumina 500K v1/3 & 610/660K | >95           | -                                                          | 888                          | 1,261 | 409                         | 41.0              | 1.21           | 0.271   |
| MedStar                  | 851          | Affymetrix 6.0                | >95           | -                                                          | 321                          | 412   | 118                         | 38.1              | 0.61           | 0.44    |
| MESA                     | 2,298        | IBC Cardiochip                | 100           | -                                                          | 743                          | 1,143 | 412                         | 42.8              | 0.58           | 0.447   |
| MRC Fenland - GWAS       | 1,376        | Affymetrix 500K               | 100           | rs4537545 (1.00)                                           | 465                          | 683   | 227                         | 41.4              | 0.80           | 0.37    |
| MRC Fenland - Metabochip | 3,059        | Metabochip                    | 100           | rs4129267 (1.00)                                           | 1,067                        | 1,481 | 511                         | 40.9              | 0.006          | 0.94    |
| MRC NSHD                 | 2,402        | KASPar                        | 100           | -                                                          | 806                          | 1,139 | 457                         | 42.7              | 2.33           | 0.127   |
| NPHS-II                  | 2,755        | ABI TaqMan                    | 97            | -                                                          | 940                          | 1,219 | 508                         | 41.9              | 10.00          | 0.002   |
| PREVEND                  | 3,876        | KASPar                        | 100           | -                                                          | 1,365                        | 1,869 | 633                         | 40.5              | 0.03           | 0.87    |

|                     |       |                |     |                  |       |       |       |                   |      |       |
|---------------------|-------|----------------|-----|------------------|-------|-------|-------|-------------------|------|-------|
| <b>PROSPER</b>      | 5,244 | Illumina 660K  | 100 | rs4537545 (1.00) | 1,842 | 2,532 | 869   | 40.7              | 0.00 | 0.982 |
| <b>SMART</b>        | 8,026 | KASPar         | >95 | -                | 3,129 | 3,944 | 1,260 | 38.8              | 0.09 | 0.77  |
| <b>TPT</b>          | 4,114 | ABI TaqMan     | 92  | -                | 1284  | 1852  | 638   | 41.4              | 0.46 | 0.50  |
| <b>UCP</b>          | 1,632 | IBC Cardiochip | 100 | -                | 583   | 788   | 261   | 40.1              | 0.04 | 0.85  |
| <b>UDACS</b>        | 585   | ABI TaqMan     | 100 | rs8192284 (0.97) | 127   | 147   | 45    | 37.2 <sup>1</sup> | 0.06 | 0.81  |
| <b>WHI</b>          | 5,723 | IBC Cardiochip | 100 | -                | 1931  | 2771  | 1010  | 41.9              | 0.09 | 0.770 |
| <b>Whitehall II</b> | 5,059 | IBC Cardiochip | 100 | -                | 1710  | 2451  | 881   | 41.8              | 0.00 | 0.957 |

MAF - minor allele frequency

\*Linkage disequilibrium (LD) data derived from 1000 Genomes Pilot 1

<sup>1</sup> Minor allele frequency in diabetes cases

<sup>2</sup> Minor allele frequency in CHD cases

Supplementary Table 6 - SNPs within 55kb of IL6R on the Cardiochip platform and their associations with log IL-6 in the Whitehall II study

| Selected for analysis | SNP               | Chr.     | Base pair position | Association with log-IL-6 |                           |                         |                               |
|-----------------------|-------------------|----------|--------------------|---------------------------|---------------------------|-------------------------|-------------------------------|
|                       |                   |          |                    | No. of participants       | $\beta$ -coefficient (SE) | 95% Confidence interval | Regression model p-value      |
|                       | rs7518199         | 1        | 152674043          | 4475                      | 0.089 (0.012)             | 0.064 to 0.113          | 1.52x10 <sup>-12</sup>        |
|                       | rs4129267         | 1        | 152692888          | 4473                      | 0.088 (0.012)             | 0.064 to 0.113          | 1.77 x10 <sup>-12</sup>       |
|                       | rs4537545         | 1        | 152685503          | 4472                      | 0.087 (0.012)             | 0.063 to 0.112          | 2.73 x10 <sup>-12</sup>       |
| ✓                     | <b>rs7529229</b>  | <b>1</b> | <b>152687402</b>   | <b>4472</b>               | <b>0.086 (0.012)</b>      | <b>0.061 to 0.110</b>   | <b>6.15 x10<sup>-12</sup></b> |
| ✓                     | <b>rs12740969</b> | <b>1</b> | <b>152753684</b>   | <b>4479</b>               | <b>-0.078 (0.013)</b>     | <b>-0.103 to -0.052</b> | <b>2.20 x10<sup>-09</sup></b> |
|                       | rs4553185         | 1        | 152677579          | 4469                      | -0.064 (0.012)            | -0.088 to -0.039        | 3.22 x10 <sup>-07</sup>       |
| ✓                     | <b>rs4845371</b>  | <b>1</b> | <b>152674964</b>   | <b>4462</b>               | <b>-0.062 (0.013)</b>     | <b>-0.087 to -0.038</b> | <b>6.78 x10<sup>-07</sup></b> |
|                       | rs4509570         | 1        | 152703008          | 4476                      | -0.073 (0.015)            | -0.102 to -0.044        | 7.17 x10 <sup>-07</sup>       |
|                       | rs4845625         | 1        | 152688691          | 4473                      | -0.062 (0.012)            | -0.086 to -0.037        | 7.92 x10 <sup>-07</sup>       |
|                       | rs28638007        | 1        | 152687978          | 4485                      | -0.061 (0.012)            | -0.086 to -0.037        | 8.57 x10 <sup>-07</sup>       |
|                       | rs7553796         | 1        | 152671030          | 4458                      | -0.061 (0.013)            | -0.086 to -0.037        | 9.64 x10 <sup>-07</sup>       |
|                       | rs6667434         | 1        | 152675724          | 4476                      | -0.060 (0.013)            | -0.085 to -0.036        | 1.55 x10 <sup>-06</sup>       |
|                       | rs4845618         | 1        | 152666639          | 4470                      | -0.055 (0.012)            | -0.080 to -0.031        | 9.26 x10 <sup>-06</sup>       |
|                       | rs4845626         | 1        | 152690109          | 4486                      | -0.045 (0.016)            | -0.078 to -0.013        | 0.006                         |
|                       | rs4845374         | 1        | 152693571          | 4484                      | -0.046 (0.017)            | -0.079 to -0.013        | 0.006                         |
|                       | rs8192282         | 1        | 152668303          | 4488                      | -0.046 (0.017)            | -0.079 to -0.013        | 0.007                         |
|                       | rs11804305        | 1        | 152691121          | 4486                      | -0.046 (0.017)            | -0.079 to -0.013        | 0.007                         |
|                       | rs4329505         | 1        | 152699044          | 4481                      | -0.044 (0.017)            | -0.077 to -0.011        | 0.009                         |
|                       | rs10159236        | 1        | 152698029          | 4486                      | -0.043 (0.017)            | -0.076 to -0.010        | 0.010                         |
|                       | rs12083537        | 1        | 152647727          | 4475                      | 0.035 (0.015)             | 0.005 to 0.065          | 0.021                         |
|                       | rs7411976         | 1        | 152649067          | 4481                      | 0.103 (0.047)             | 0.010 to 0.196          | 0.029                         |
|                       | rs1386821         | 1        | 152648673          | 4480                      | 0.028 (0.016)             | -0.003 to 0.059         | 0.073                         |
|                       | rs2229237         | 1        | 152668420          | 4489                      | -0.068 (0.066)            | -0.197 to 0.060         | 0.298                         |
|                       | rs1552481         | 1        | 152642977          | 4488                      | 0.285 (0.338)             | -0.378 to 0.948         | 0.399                         |
|                       | rs6427641         | 1        | 152647110          | 4479                      | 0.007 (0.012)             | -0.017 to 0.032         | 0.572                         |
|                       | rs12089132        | 1        | 152644960          | 4489                      | 0.284 (0.586)             | -0.865 to 1.432         | 0.628                         |
|                       | rs3887104         | 1        | 152643295          | 4477                      | -0.008 (0.016)            | -0.040 to 0.024         | 0.640                         |
|                       | rs4075015         | 1        | 152655820          | 4465                      | -0.006 (0.013)            | -0.031 to 0.019         | 0.643                         |
|                       | rs12096944        | 1        | 152663782          | 4487                      | 0.104 (0.239)             | -0.365 to 0.573         | 0.663                         |
|                       | rs4601580         | 1        | 152661041          | 4481                      | -0.003 (0.012)            | -0.027 to 0.022         | 0.819                         |
|                       | rs12739228        | 1        | 152692814          | 4489                      | -0.007 (0.033)            | -0.072 to 0.058         | 0.838                         |
|                       | rs1552482         | 1        | 152642862          | 4489                      | 0.062 (0.338)             | -0.601 to 0.726         | 0.853                         |
|                       | rs11265610        | 1        | 152647408          | 4487                      | 0.062 (0.338)             | -0.601 to 0.725         | 0.854                         |
|                       | rs28730735        | 1        | 152693656          | 4486                      | -0.016 (0.115)            | -0.242 to 0.210         | 0.892                         |
|                       | rs4845617         | 1        | 152644522          | 4452                      | -0.001 (0.013)            | -0.026 to 0.024         | 0.948                         |
|                       | rs2054855         | 1        | 152637562          | 4478                      | 0.001 (0.018)             | -0.035 to 0.037         | 0.957                         |
|                       | rs34099703        | 1        | 152668336          | 4489                      | -0.026 (0.586)            | -1.175 to 1.122         | 0.964                         |
|                       | rs4845616*        | 1        | 152644193          | 4488                      | -                         | -                       | -                             |

|             |   |           |      |   |   |   |
|-------------|---|-----------|------|---|---|---|
| rs4845615*  | 1 | 152641901 | 4489 | - | - | - |
| rs28730736* | 1 | 152693674 | 4487 | - | - | - |
| rs7537306*  | 1 | 152667629 | 4489 | - | - | - |
| rs28730732* | 1 | 152668229 | 4463 | - | - | - |

SNPs are ranked on p-value and  $\beta$ -coefficient;  $\beta$ -coefficients are reported on the log scale.

\*There was no variation in genotype at these very rare SNPs in the Whitehall II study sample and consequently a regression model could not be fitted.

**Supplementary Table 7 - Safety endpoints in trials of tocilizumab therapy**

| Endpoint(s)*                                           | No. of RCTs | No. randomised | No. of events | Odds ratio (95%CI)†  | P                        | I <sup>2</sup> (%) |
|--------------------------------------------------------|-------------|----------------|---------------|----------------------|--------------------------|--------------------|
| <b>CARDIAC</b>                                         |             |                |               |                      |                          |                    |
| Myocardial infarction                                  | 1           | 335            | 1             | 0.30 (0.01, 7.49)    | 0.47                     | -                  |
| Cardiac                                                | 1           | 410            | 2             | 0.99 (0.06, 15.94)   | 0.99                     | -                  |
| Serious cardiac                                        | 2           | 1629           | 6             | 1.31 (0.23, 7.42)    | 0.76                     | 0                  |
| Hypertension                                           | 2           | 1629           | 70            | 1.41 (0.83, 2.39)    | 0.20                     | 18.5               |
| <b>VASCULAR</b>                                        |             |                |               |                      |                          |                    |
| Vascular                                               | 3           | 1965           | 120           | 1.34 (0.90, 1.99)    | 0.15                     | 0                  |
| <b>DEATH</b>                                           |             |                |               |                      |                          |                    |
| Death                                                  | 2           | 2346           | 8             | 1.86 (0.45, 7.60)    | 0.39                     | 63.8               |
| <b>NERVOUS SYSTEM</b>                                  |             |                |               |                      |                          |                    |
| Nervous system                                         | 3           | 1964           | 245           | 1.26 (0.95, 1.68)    | 0.10                     | 0                  |
| Serious nervous system                                 | 2           | 1629           | 10            | 1.40 (0.35, 5.53)    | 0.63                     | 0                  |
| <b>RESPIRATORY</b>                                     |             |                |               |                      |                          |                    |
| Serious respiratory                                    | 2           | 744            | 43            | 0.96 (0.51, 1.79)    | 0.89                     | 0                  |
| <b>INFECTION</b>                                       |             |                |               |                      |                          |                    |
| Infection and infestation                              | 3           | 1964           | 705           | 1.30 (1.07, 1.58)    | 0.008                    | 0                  |
| Upper respiratory tract infection                      | 2           | 534            | 37            | 1.20 (0.61, 2.34)    | 0.60                     | 0                  |
| Pneumonia                                              | 2           | 2019           | 9             | 0.87 (0.23, 3.29)    | 0.84                     | 0                  |
| Serious infection                                      | 5           | 2854           | 70            | 2.29 (1.33, 3.92)    | 0.003                    | 12.2               |
| <b>IMMUNOSUPPRESSION</b>                               |             |                |               |                      |                          |                    |
| Grade 3 neutropenia (0.5 to <1.0 × 10 <sup>9</sup> /L) | 3           | 2346           | 51            | 26.00 (5.02, 134.70) | 9.34 × 10 <sup>-6</sup>  | 0                  |
| <b>NEOPLASIA</b>                                       |             |                |               |                      |                          |                    |
| Neoplasia                                              | 2           | 1200           | 4             | 0.42 (0.06, 2.88)    | 0.38                     | 0                  |
| <b>LIPIDS</b>                                          |             |                |               |                      |                          |                    |
| Total cholesterol >6.2mmol/L or >240mg/dL              | 3           | 2420           | 391           | 4.87 (3.64, 6.51)    | 1.74 × 10 <sup>-26</sup> | 0                  |
| HDL-C >+30% or >60mg/dL or 1.6mmol/L                   | 4           | 2755           | 319           | 2.46 (1.88, 3.22)    | 5.06 × 10 <sup>-11</sup> | 67.7               |
| LDL >160mg/dL or >4.1mmol/L                            | 3           | 2346           | 255           | 5.11 (3.52, 7.41)    | 7.18 × 10 <sup>-18</sup> | 0                  |
| LDL:HDL lipoprotein index >30%†                        | 2           | 1555           | 266           | 1.97 (1.46, 2.67)    | 9.34 × 10 <sup>-6</sup>  | 0                  |
| Triglycerides >500mg/dL or >5.7mmol/L                  | 1           | 1220           | 15            | 1.42 (0.45, 4.50)    | 0.55                     | -                  |
| ApoB:ApoA1 atherogenic index >30%†                     | 2           | 1555           | 150           | 1.26 (0.88, 1.81)    | 0.21                     | 0                  |
| <b>HEPATIC ENZYMES</b>                                 |             |                |               |                      |                          |                    |
| ALT >3x ULN                                            | 4           | 2755           | 94            | 6.96 (3.58, 13.50)   | 9.95 × 10 <sup>-9</sup>  | 0                  |
| AST >3u ULN                                            | 3           | 2420           | 30            | 4.75 (1.66, 13.62)   | 0.004                    | 0                  |

\* **Endpoint(s) definitions.** **Cardiac:** Smolen<sup>62</sup> - not defined. **Serious cardiac:** Smolen – not defined; Genovese<sup>63</sup> – not defined. **Vascular:** Emery<sup>64</sup> – not defined; Smolen – not defined; Genovese – not defined. **Nervous system:** Genovese – not defined; Smolen – not defined; Emery – not defined. **Serious nervous system:** Genovese – not defined; Smolen – not defined. **Infection and infestation:** Genovese – not formally defined, including upper respiratory tract infections, skin and subcutaneous tissue infections; Emery – not defined; Smolen – not defined. **Serious infection:** Maini – not formally defined, including arthritis and 2 cases of sepsis; Kremer<sup>65</sup> - not formally defined, including lower respiratory tract and gastrointestinal infections; Genovese - not formally defined, including staphylococcal cellulitis, acute pyelonephritis, sepsis and pneumonia; Smolen – not formally defined, including urinary tract infection, pneumonia, cellulitis, peridiverticular abscess and upper respiratory tract infection; Emery - not formally defined, including staphylococcal polyarthritis, cellulitis, necrotising pneumonia, urosepsis, osteomyelitis. **Serious respiratory:** Smolen – not formally defined, including idiopathic pulmonary fibrosis; Emery – not defined. **Neoplasia:** Smolen – not defined; Kremer: solid malignancy in TCZ group (uterine cancer, n=1), solid malignancy in placebo group (breast cancer n=1).

† Pooled using Mantel-Haenszel fixed effects models



**Supplementary Table 8** - Associations of the functional *IL6R* rs8192284 variant with IL-6, CRP and fibrinogen concentrations in the Whitehall II study

| <b>Whitehall II</b> |          |                                                                 |
|---------------------|----------|-----------------------------------------------------------------|
| <b>Biomarker</b>    | <i>n</i> | <i>% difference in geometric mean per minor allele (95% CI)</i> |
| IL-6                | 4,480    | 9.26 (6.62 to 11.96)                                            |
| CRP                 | 4,503    | -9.35 (-13.66 to -4.83)                                         |
| Fibrinogen          | 4,466    | -0.87 (-1.79 to 0.06)                                           |

**Supplementary Figures**

- 1 - Mechanisms of IL-6 receptor production, IL-6 signalling and inhibition of the IL-6 receptor by tocilizumab
- 2 - Linkage disequilibrium and disease/biomarker associated SNPs in and around *IL6R* (1q21.3)
- 3 - Identification of publications contributing to the systematic review of trials of tocilizumab treatment
- 4 - Mean difference in CRP at 4 and 8mg/kg doses of tocilizumab at 4, 8 and 16 weeks of therapy
- 5 - Box and whisker plots illustrating summary values for the main inflammation and lipid markers evaluated
- 6 - Stratified associations of *IL6R* rs7529229 variant on (a) IL-6, (b) CRP, and (c) fibrinogen concentrations
- 7 - Association of *IL6R* rs7529229 with log CRP levels stratified by genotyping platform used in each study contributing to the analysis
- 8 - Association of the *IL6R* SNPs a. rs4845371 and b. rs12740969 with IL-6, CRP and fibrinogen concentration
- 9 - Stratified associations of *IL6R* rs7529229 with fatal and non-fatal coronary heart disease
- 10 - Association of *IL6R* rs7529229 with risk of CHD (fatal & non-fatal) stratified by genotyping platform used in each study contributing to the analysis

a. Production of soluble IL-6 receptor (sIL-6R) is influenced by Asp358Ala (rs8192284, tagged by rs7529229) variant in *IL6R*. Proteolytic cleavage of the mIL-6R is increased with carriage of the Ala allele resulting in greater soluble concentration of the soluble receptor and reduced numbers of functioning mIL-6R. Both classical (through the membrane-bound IL-6R) and trans-signalling (through the soluble IL-6R) pathways are active with either allele, however the preferential production of sIL-6R with the Ala allele results in increased trans-signalling and reduced classical signalling. The phenotypic effects associated with the Ala allele (and the minor allele at rs7529229) are consequences of this alteration in receptor production.

b. Tocilizumab blocks both the mIL-6R and the sIL-6R, inhibiting IL-6 signalling via both classical and trans-signalling pathways.

c. Comparison between the directions of effects of the *IL6R* variant and tocilizumab reflect the similarities and differences in the biological processes of the two scenarios.

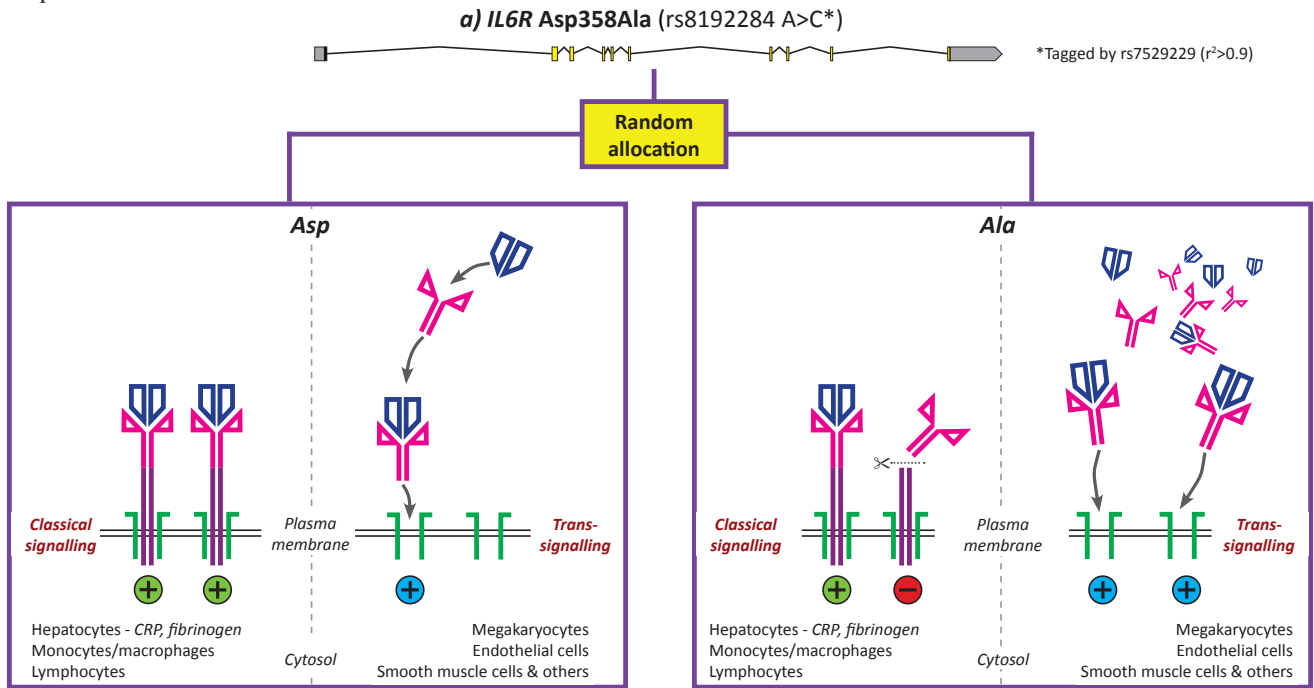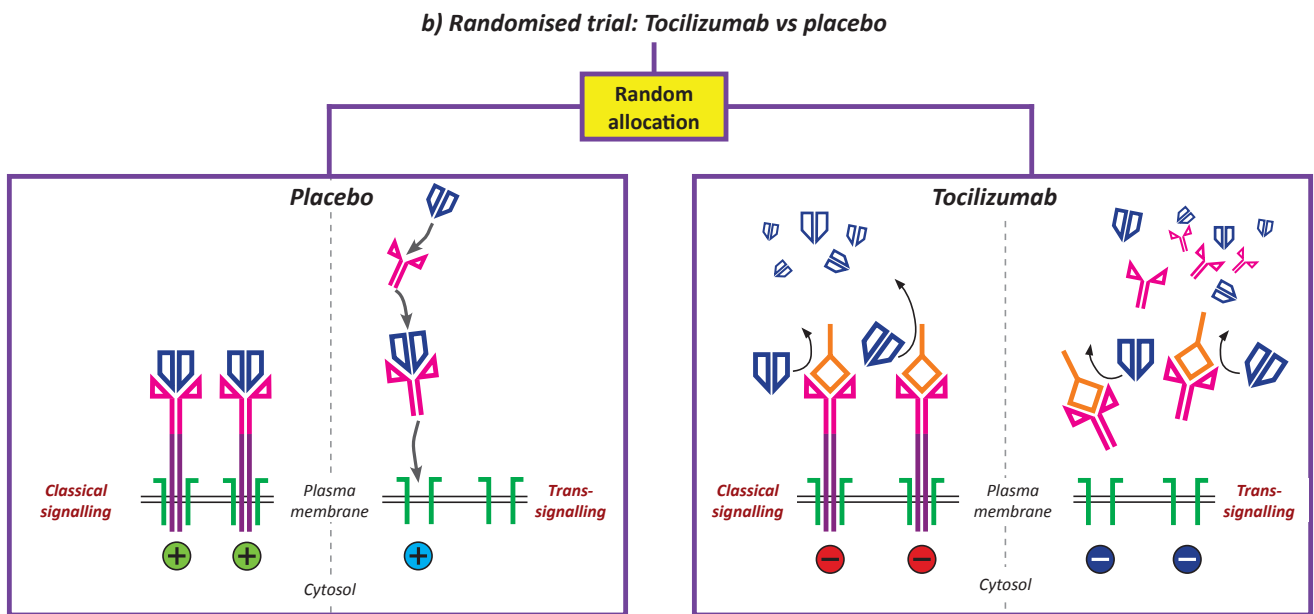

**c) *IL6R* Asp358Ala vs Tocilizumab**

|                              | <i>IL6R</i> Asp vs Ala | Tocilizumab vs placebo |                                                                                                                                                                                                            |
|------------------------------|------------------------|------------------------|------------------------------------------------------------------------------------------------------------------------------------------------------------------------------------------------------------|
| sIL-6r production (cleavage) | ↑                      | Not reported           | <div style="display: flex; flex-direction: column; align-items: center;"> <div style="margin-bottom: 10px;">↑ Upstream of IL-6R</div> <div style="margin-bottom: 10px;">↓ Downstream of IL-6R</div> </div> |
| mIL-6r signalling            | ↓                      | ↓                      |                                                                                                                                                                                                            |
| sIL-6r signalling            | ↑                      | ↑                      |                                                                                                                                                                                                            |
| Plasma sIL-6r                | ↑                      | ↑                      |                                                                                                                                                                                                            |
| Plasma IL-6                  | ↑                      | ↑                      |                                                                                                                                                                                                            |
| Plasma CRP                   | ↓                      | ↓                      |                                                                                                                                                                                                            |
| Plasma fibrinogen            | ↓                      | ↓                      |                                                                                                                                                                                                            |
| CHD risk                     | ↓                      | Not reported           |                                                                                                                                                                                                            |

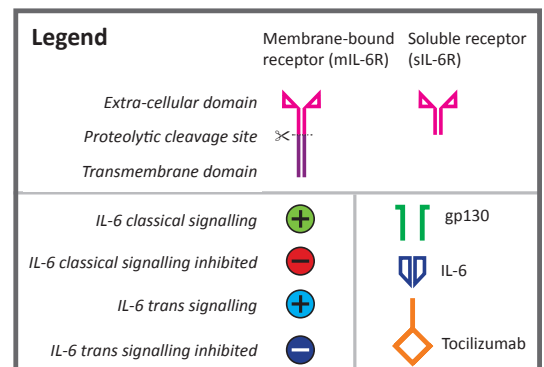

a. (left panel) SNPs on chromosome 1q21.3 in the vicinity of *IL6R* based on HapMap Phase 3 build 36.

b. (centre panel) Prior disease and biomarker associations

c. (right panel) Linkage disequilibrium ( $r^2$ ) for SNPs contributing to the current analysis

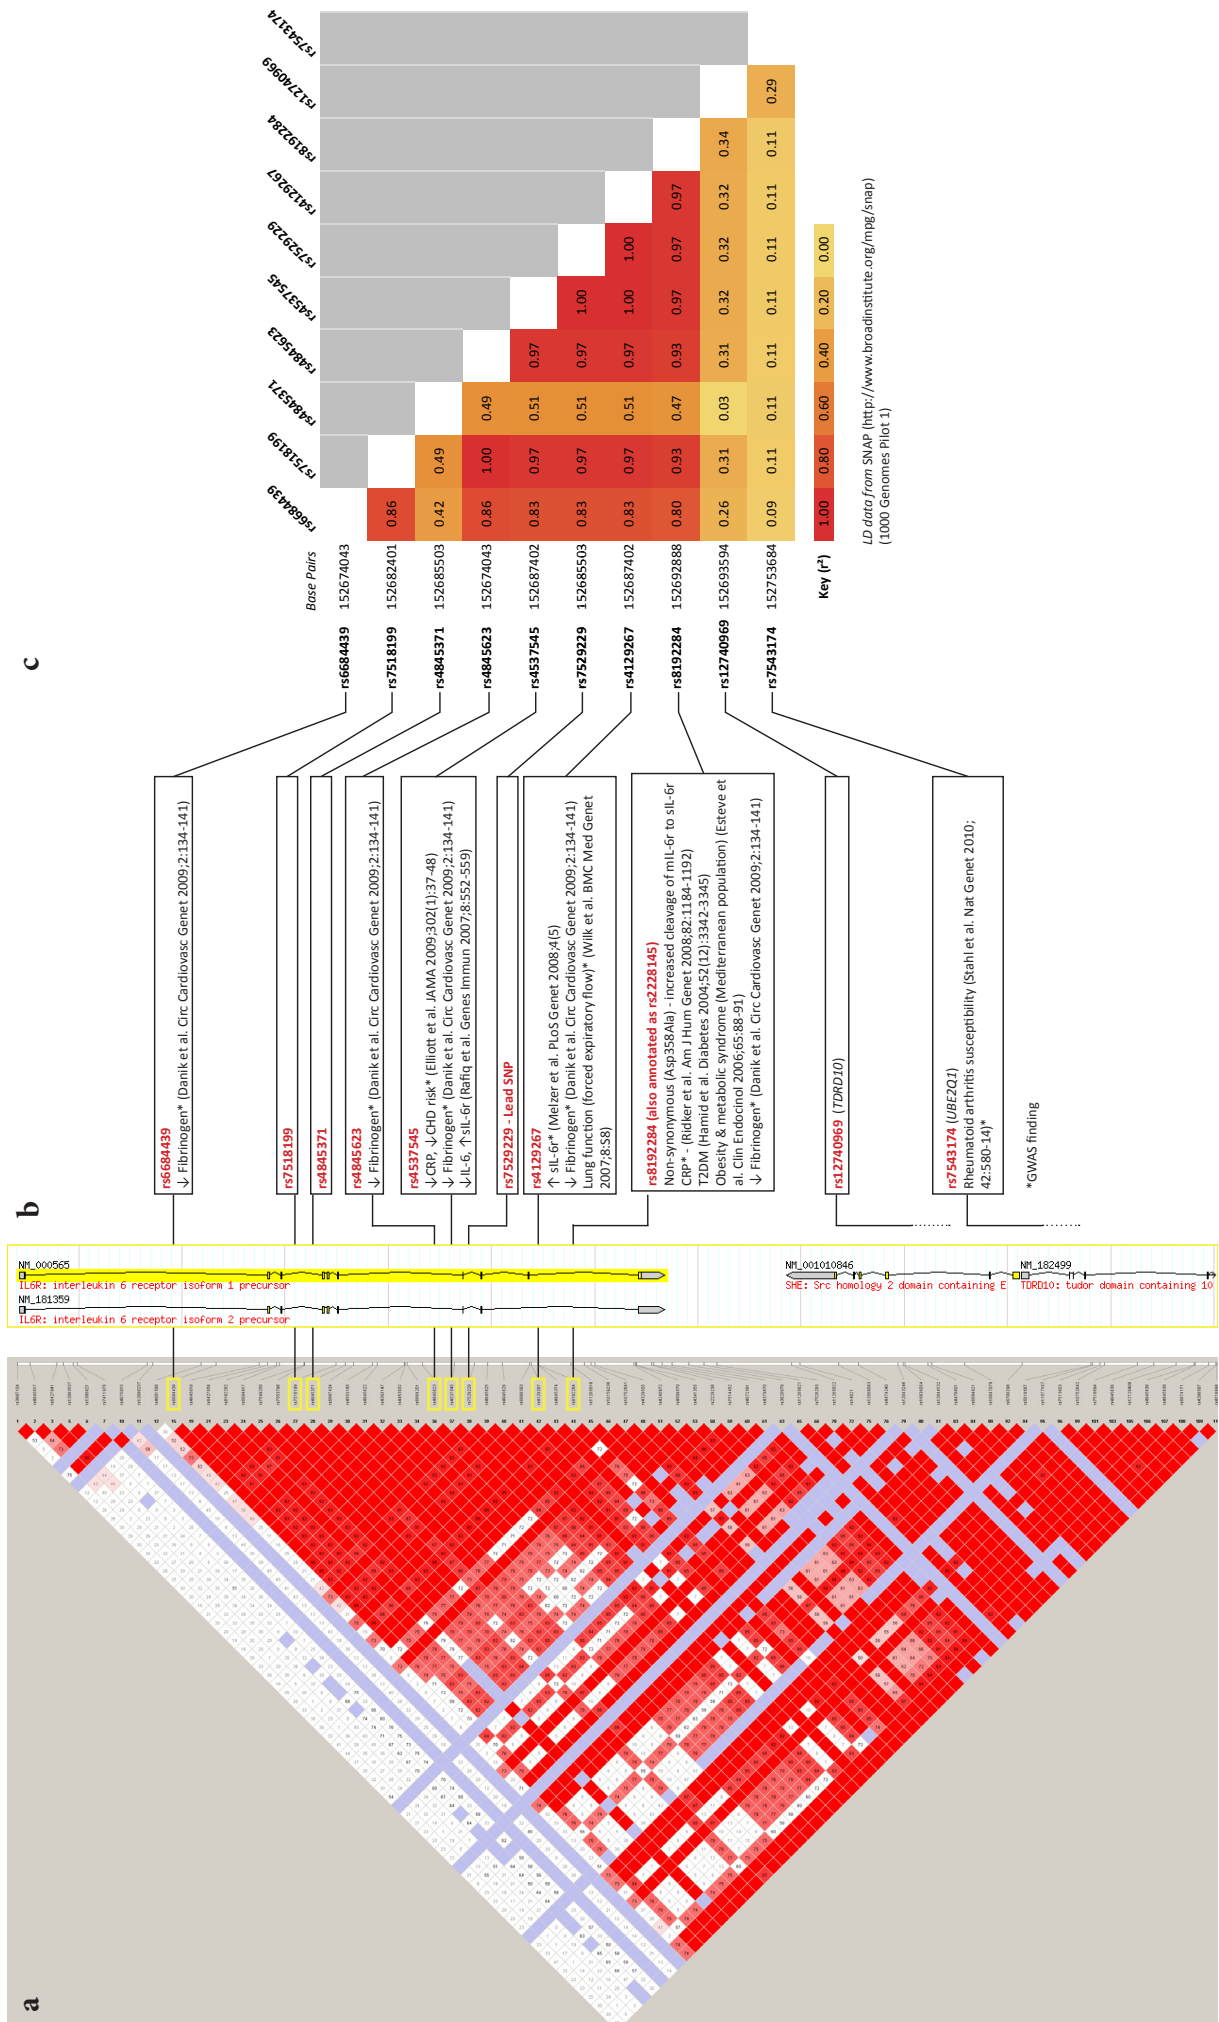

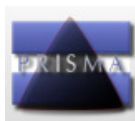

## PRISMA 2009 Flow Diagram

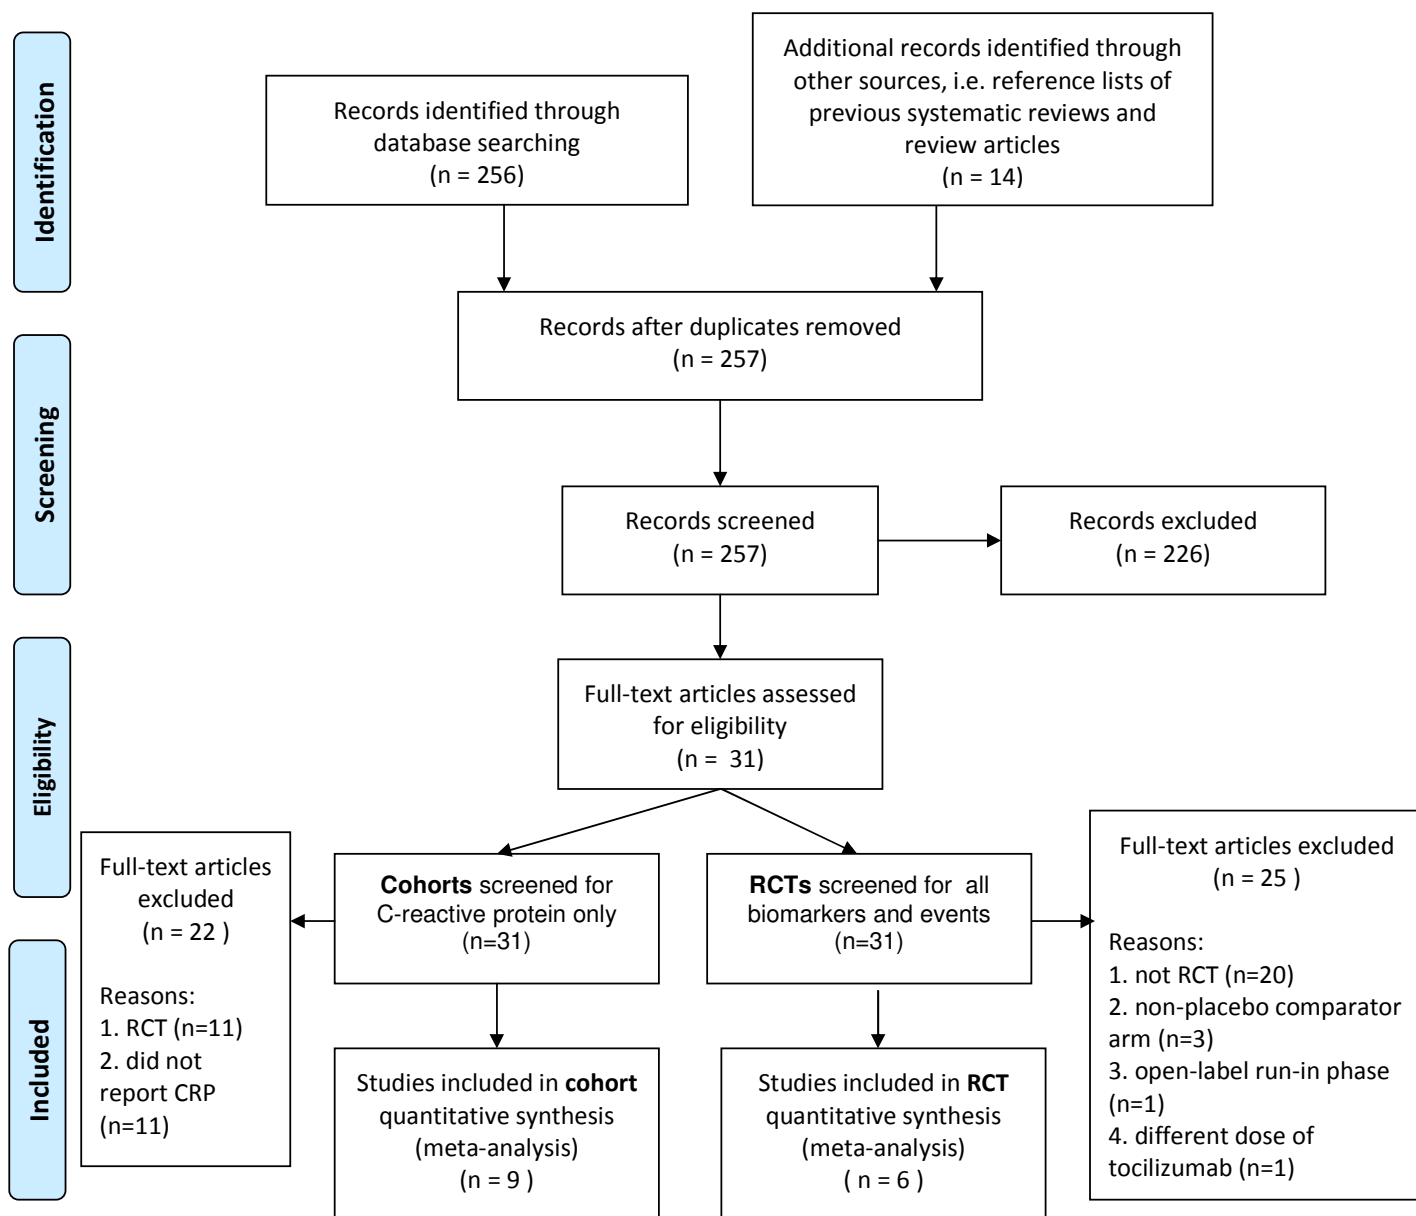

From: Moher D, Liberati A, Tetzlaff J, Altman DG, The PRISMA Group (2009). Preferred Reporting Items for Systematic Reviews and Meta-Analyses: The PRISMA Statement. PLoS Med 6(6): e1000097. doi:10.1371/journal.pmed1000097

For more information, visit [www.prisma-statement.org](http://www.prisma-statement.org).

**Supplementary Figure 4 - Mean difference in CRP at 4, 8 and 16 mg/kg doses of tocilizumab at 4-12 weeks of therapy**  
Data pooled from randomised trials of tocilizumab versus placebo in patients with rheumatoid arthritis and observational studies of tocilizumab therapy.

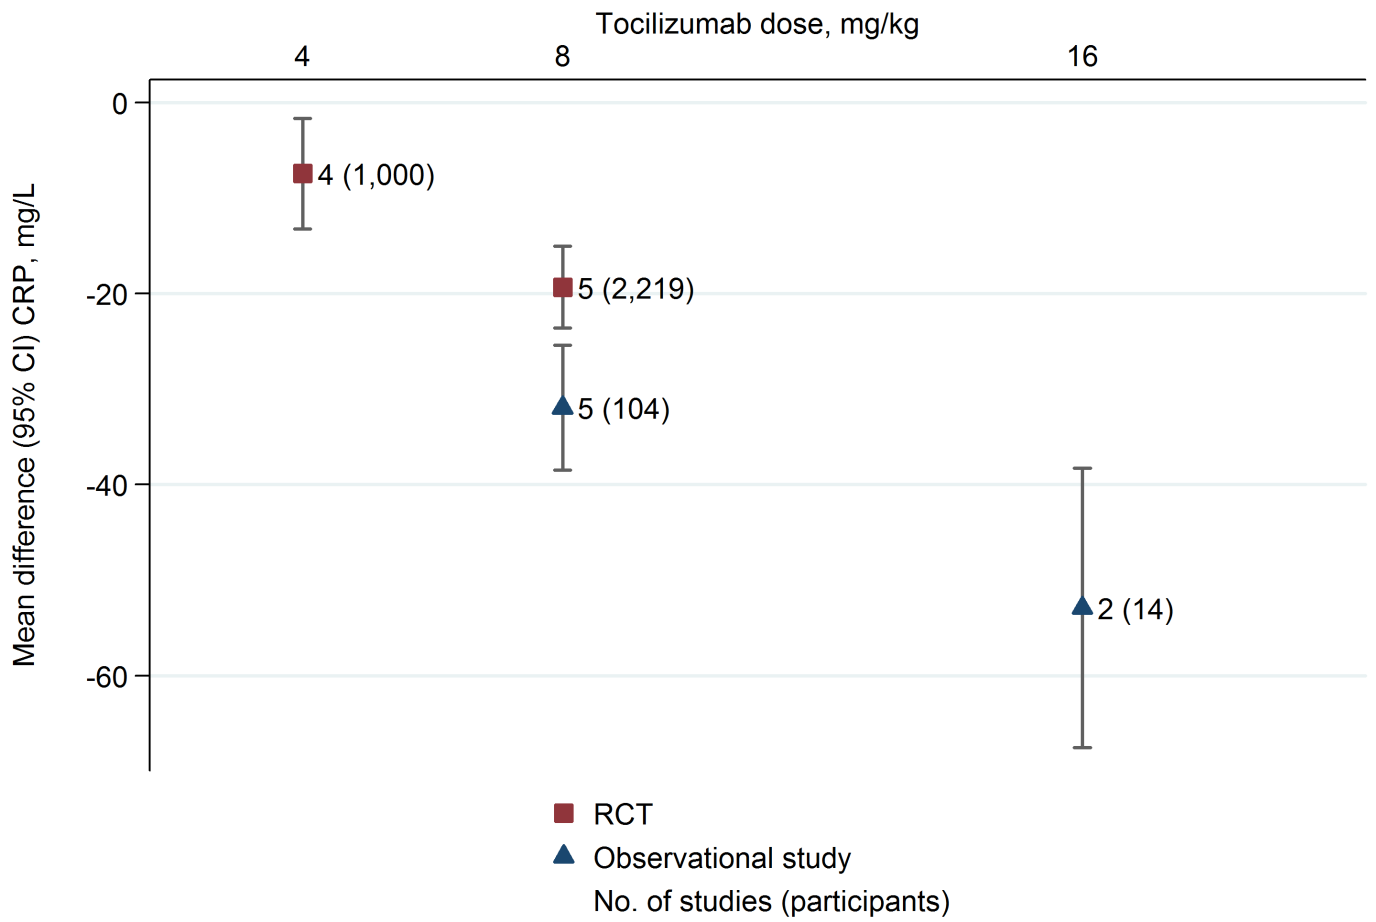

Plots show median (horizontal bar), interquartile range (box) and minimum/maximum (whiskers).

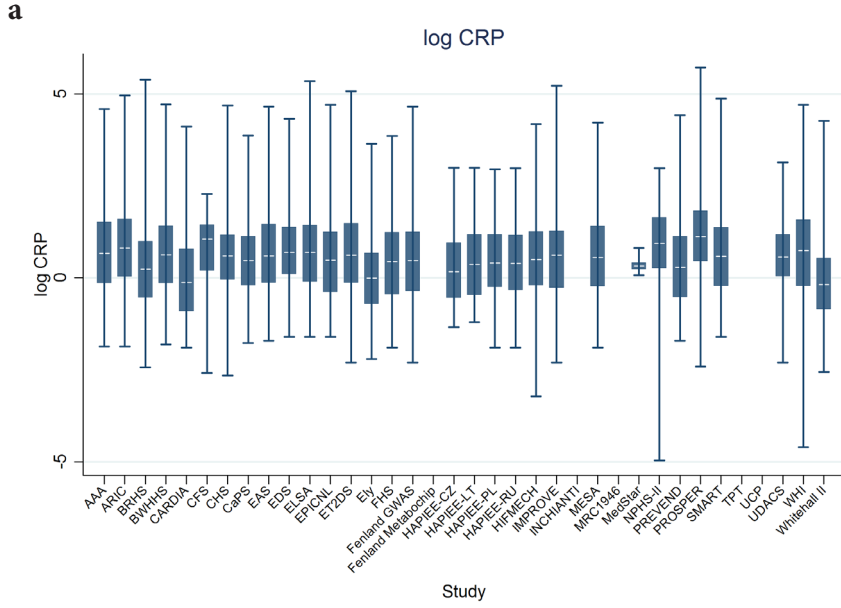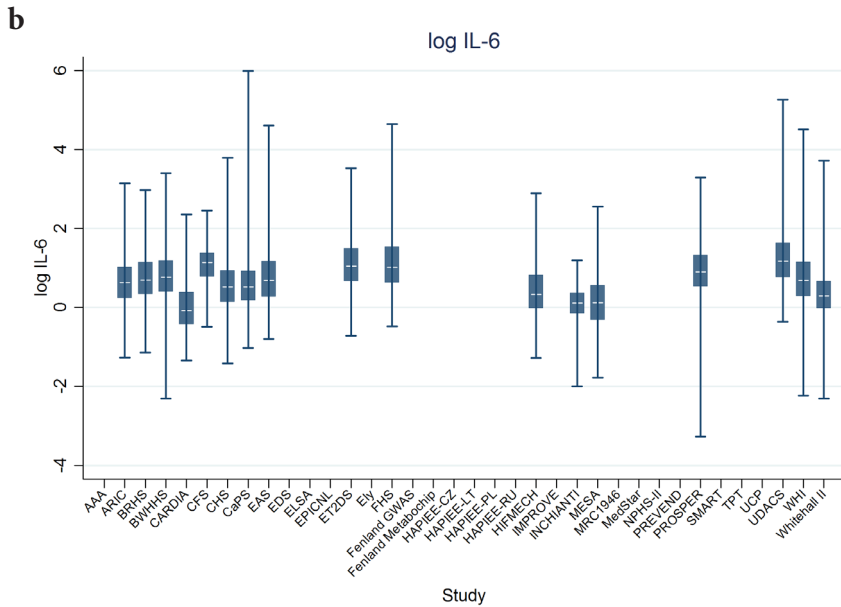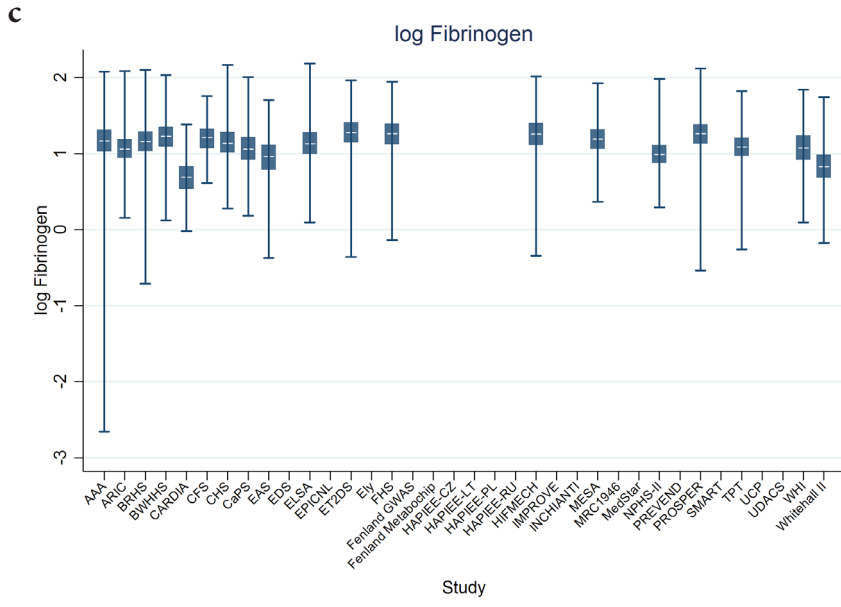

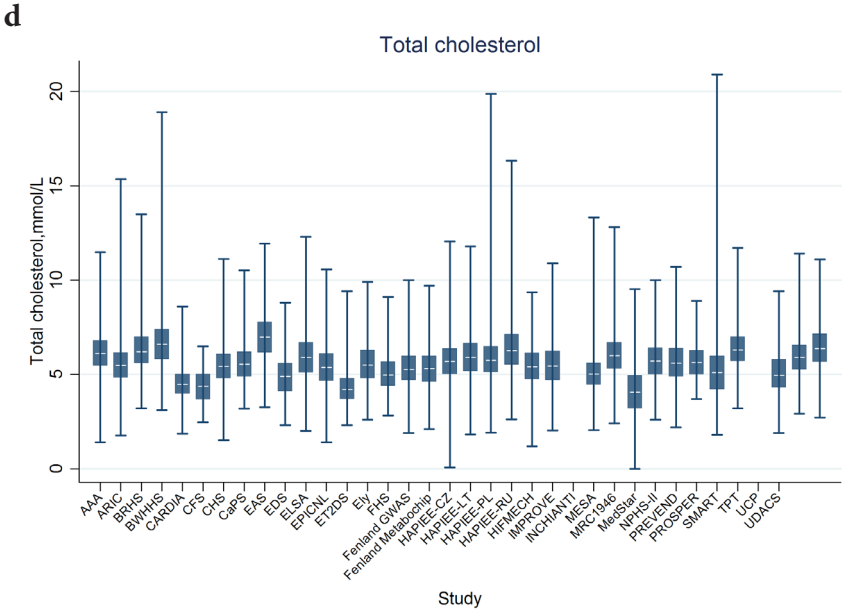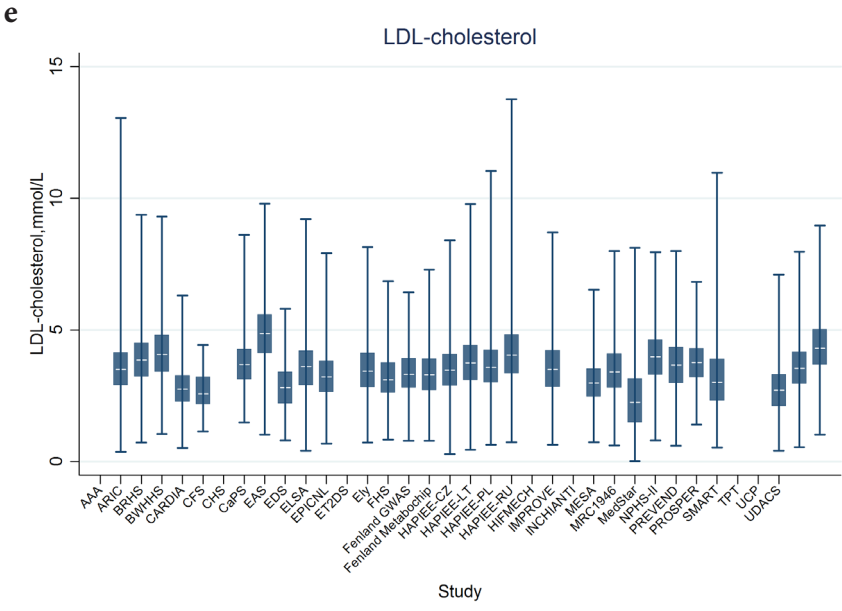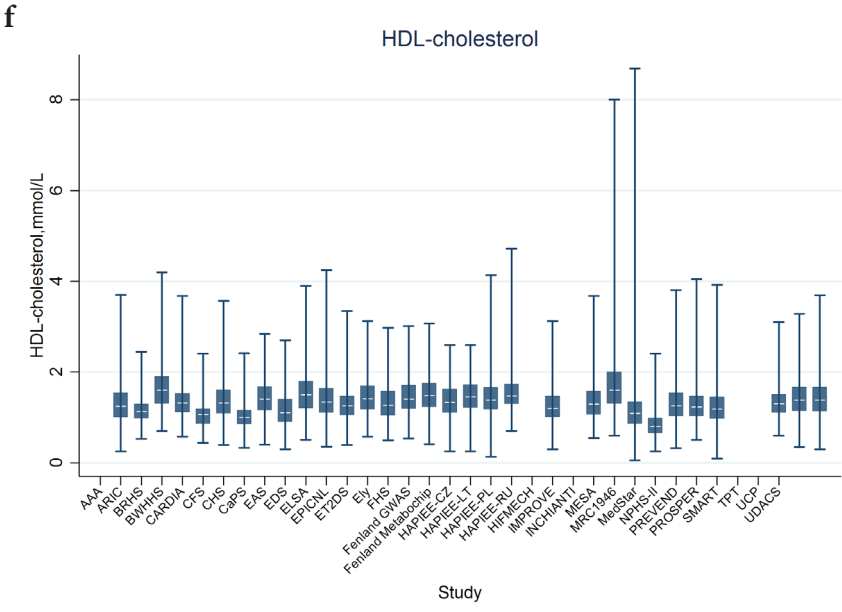



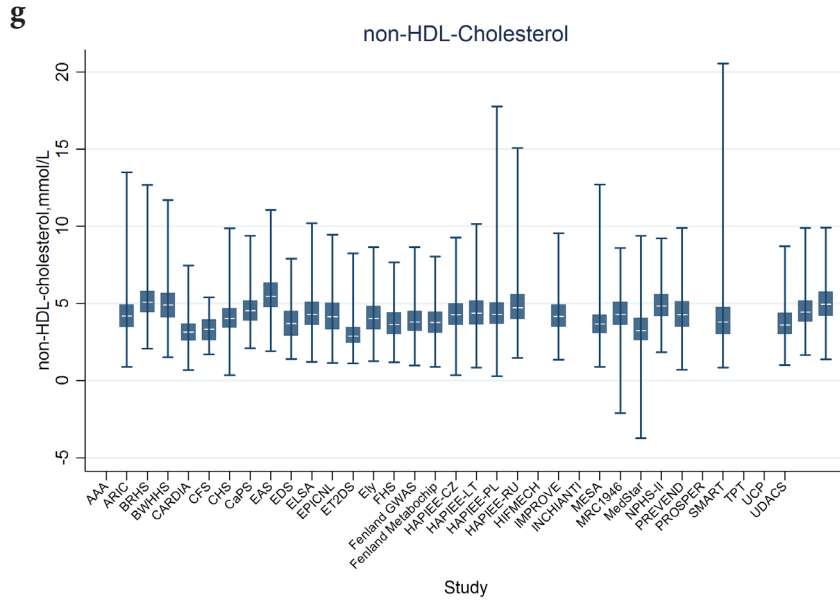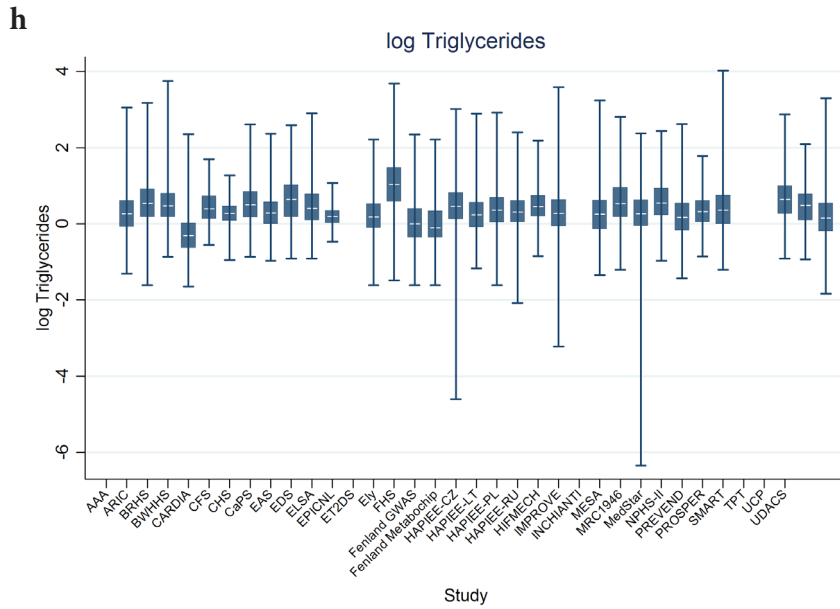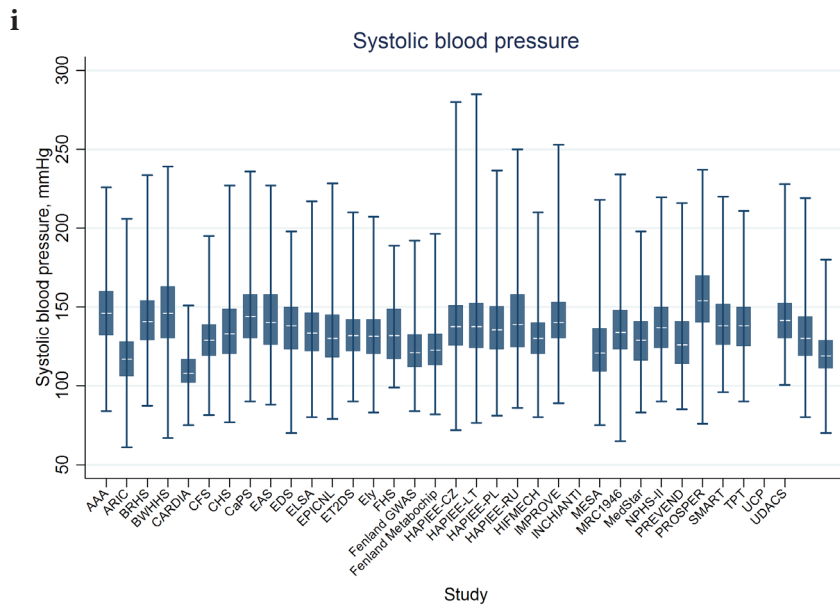

i

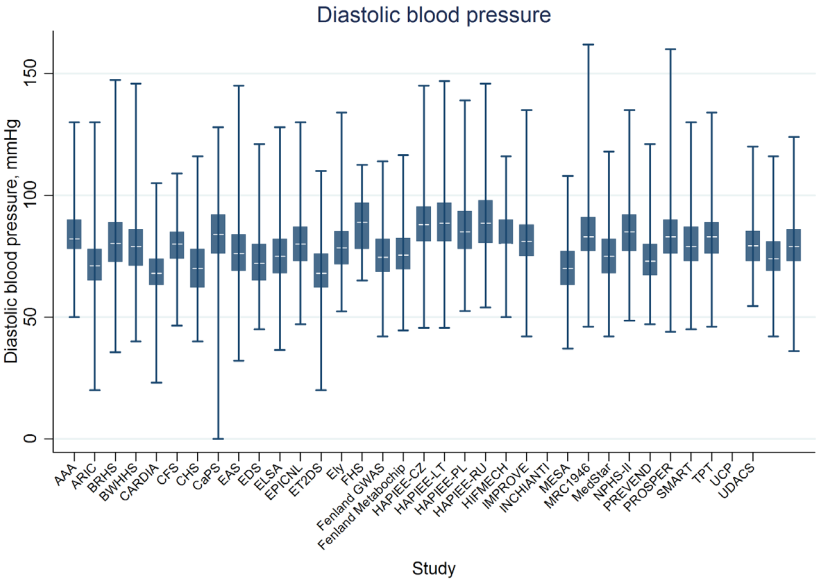

Associations are stratified by age, prevalent CHD or diabetes status, Framingham score and non-HDL levels.

**a**

Stratified effects of rs7529229 on log IL-6

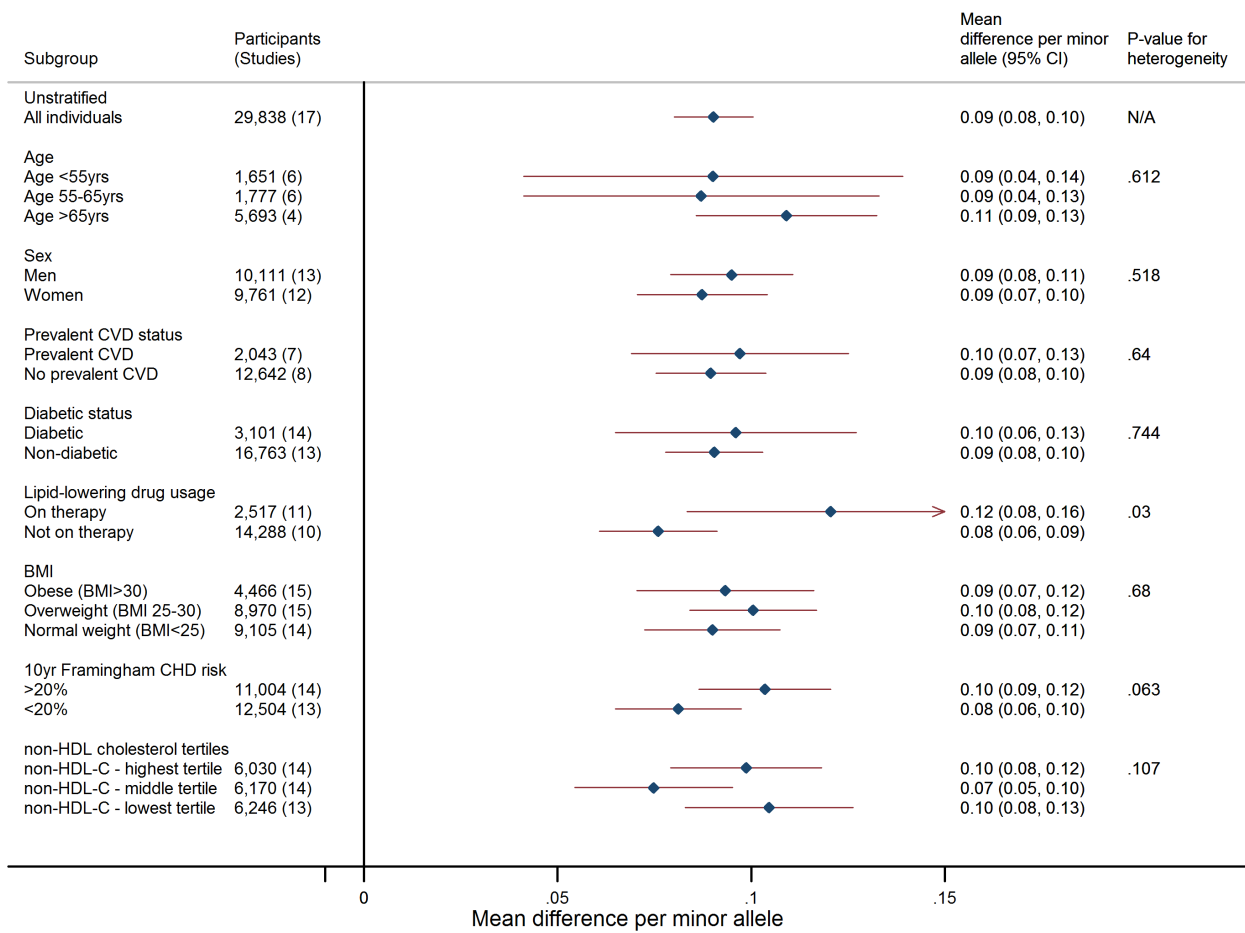

**b**

Stratified effects of rs7529229 on log CRP

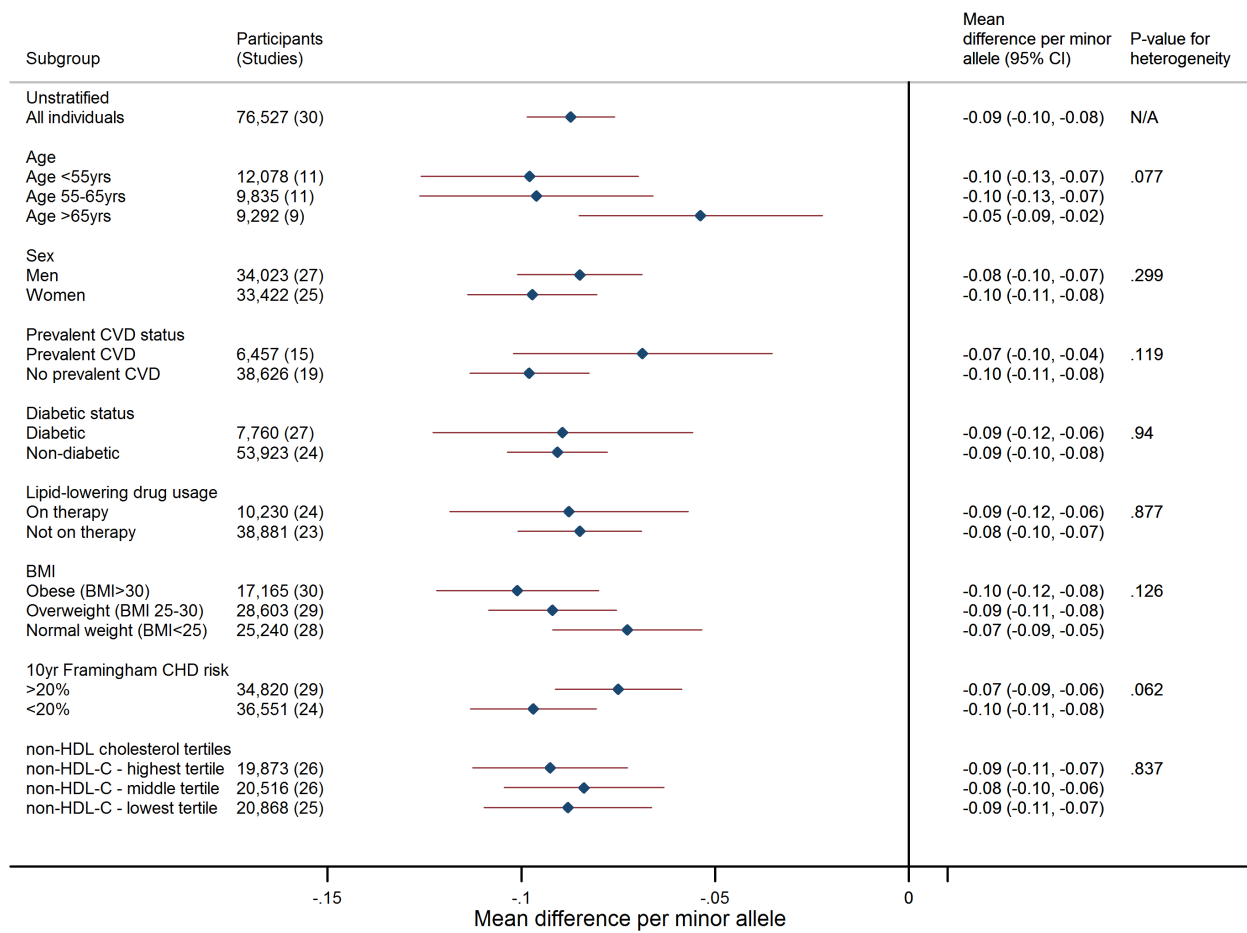

C

Stratified effects of rs7529229 on log Fibrinogen

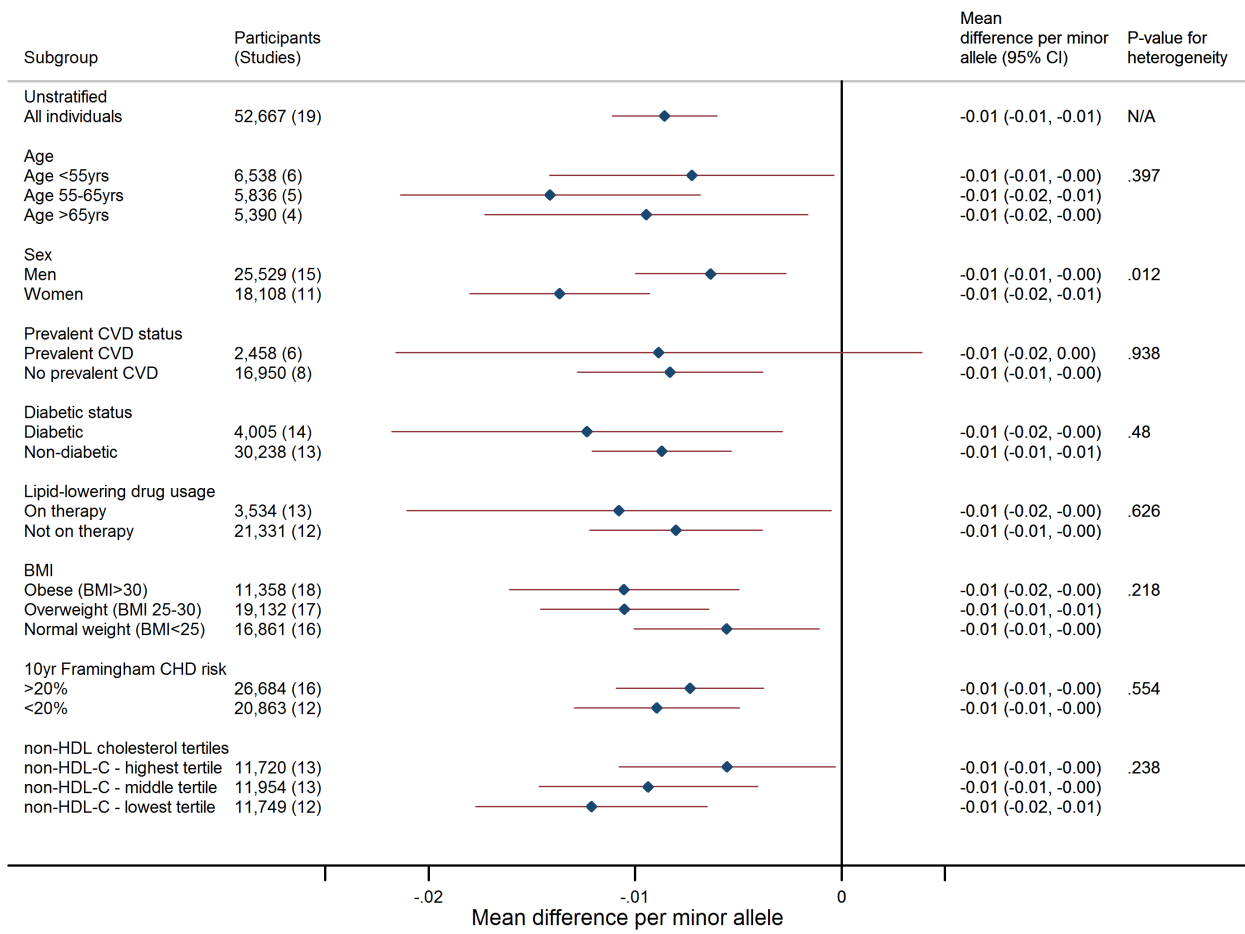

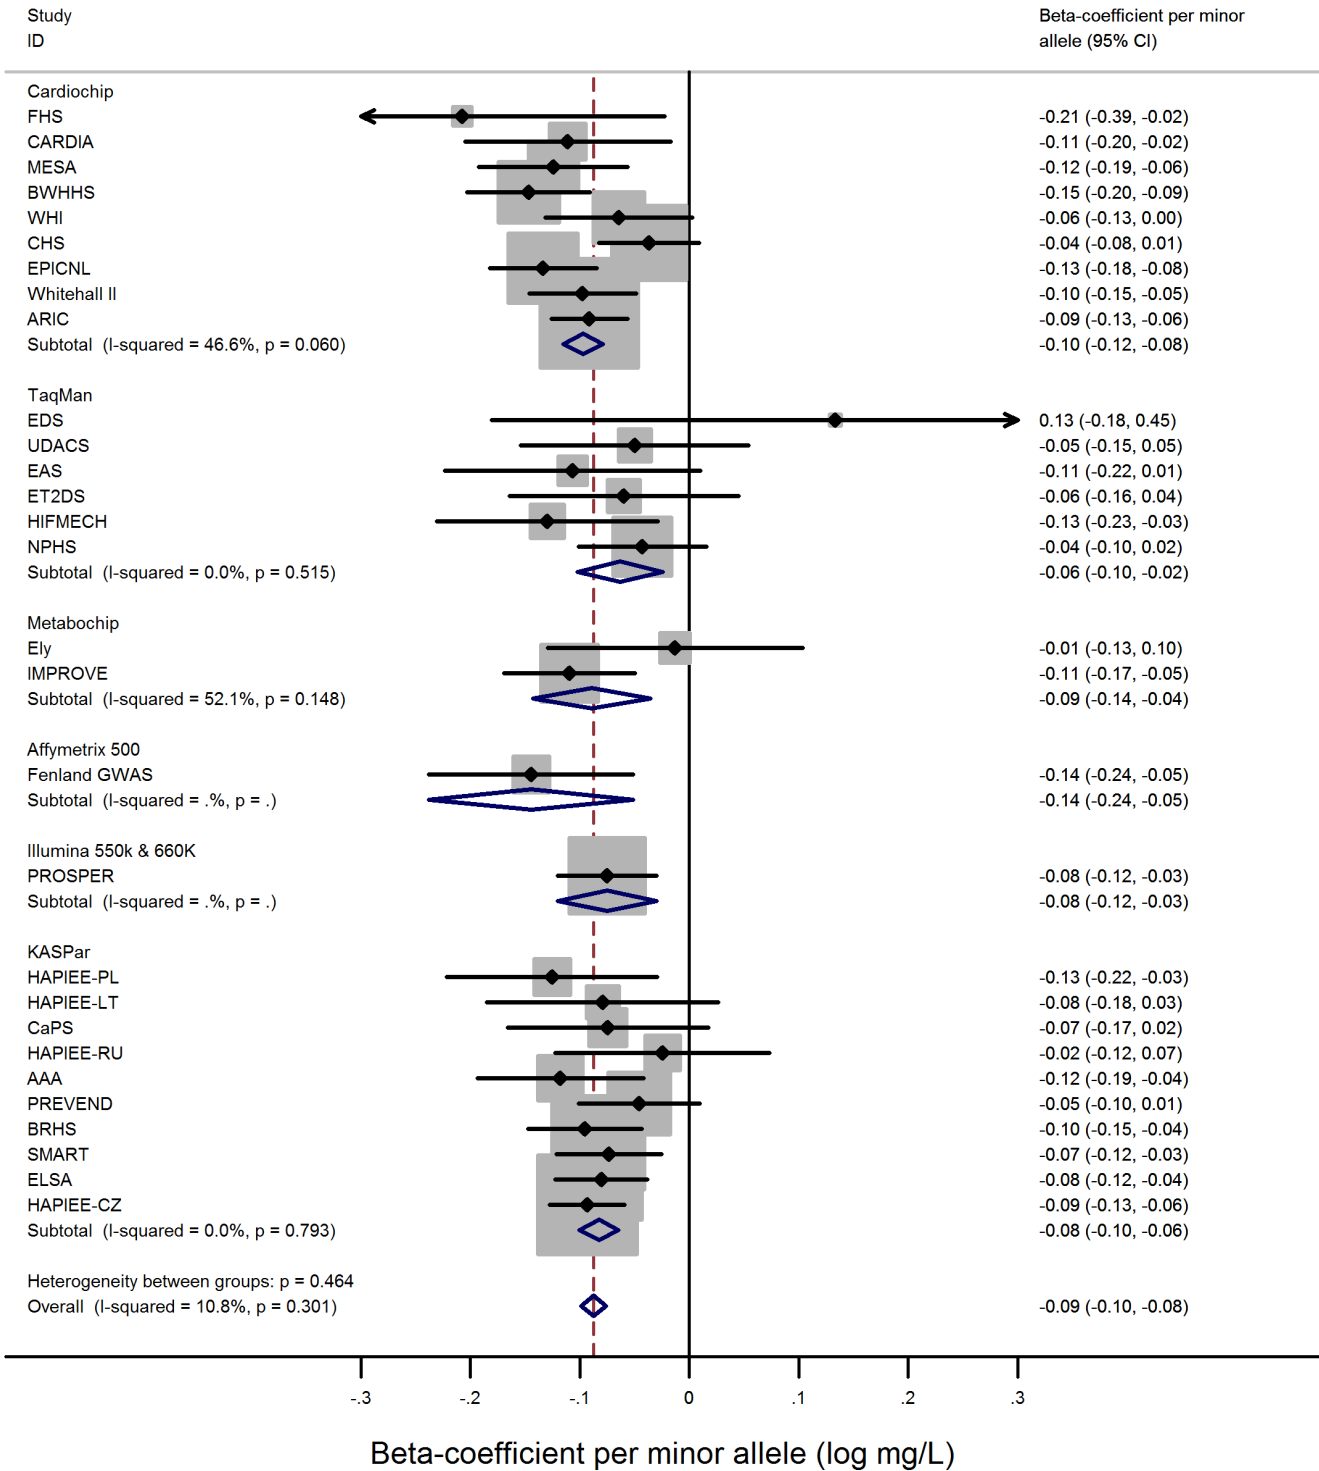

**Supplementary Figure 8 - Association of the *IL6R* SNPs a. rs4845371 and b. rs12740969 with IL-6, CRP and fibrinogen concentration.**

Estimates are based on pairwise comparison of individuals heterozygous or homozygous for the variant allele with reference to the wildtype homozygous group. The total number of participants (studies) is also shown.

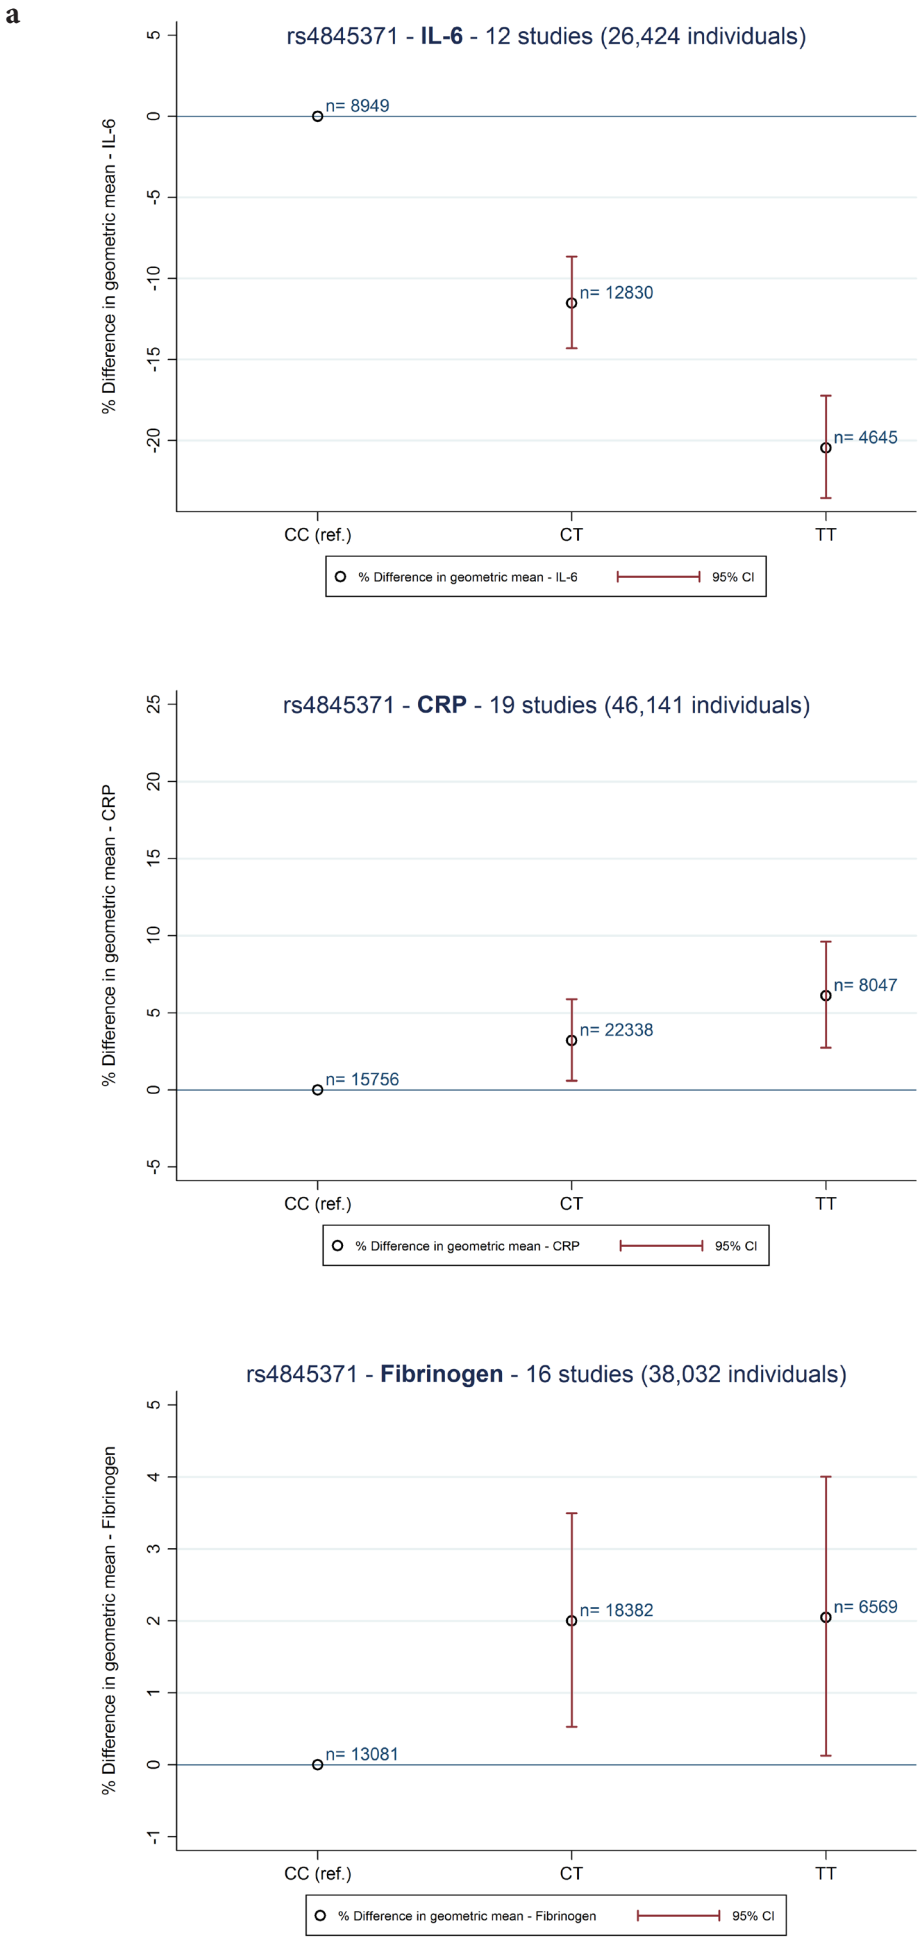

**b**

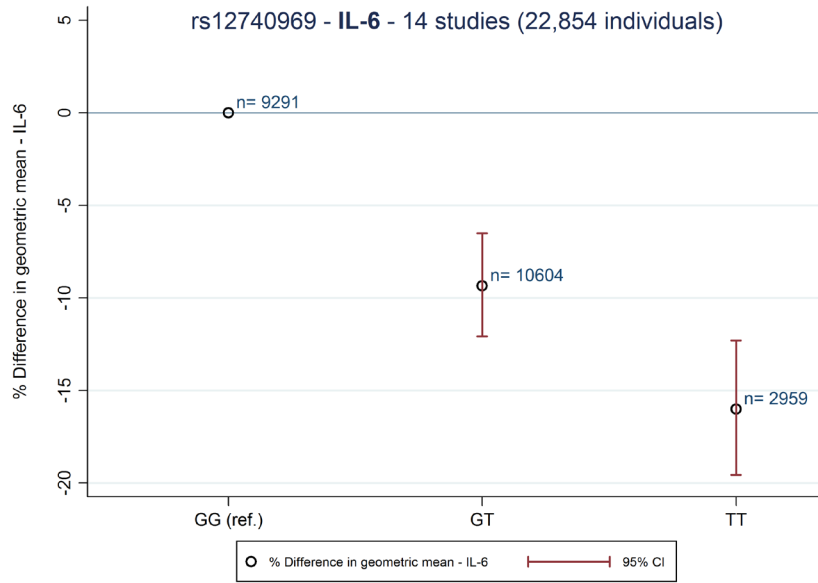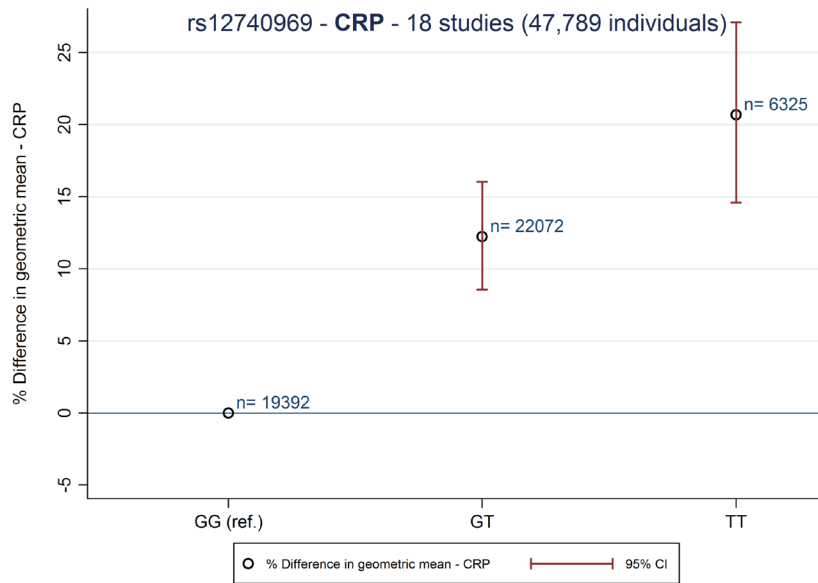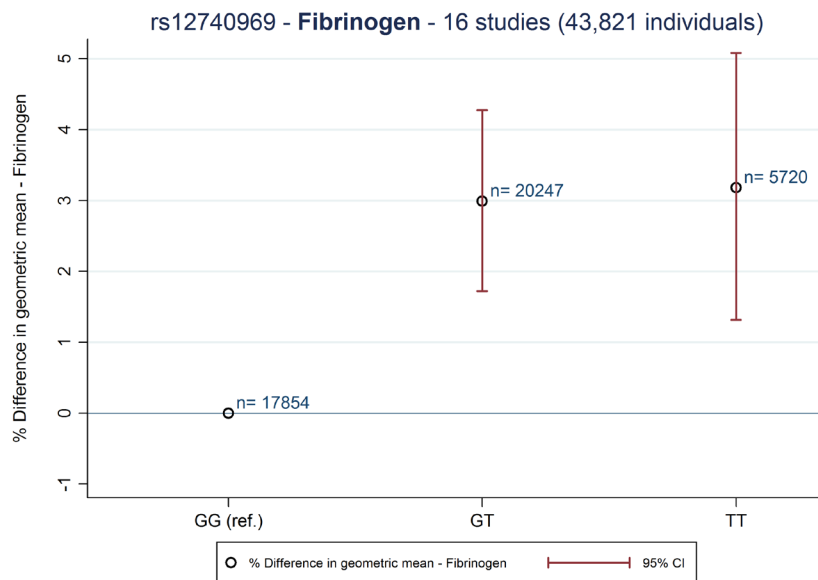



**Supplementary Figure 9 - Stratified associations of *IL6R* rs7529229 with fatal and non-fatal coronary heart disease.**

Estimates are stratified by participant age, sex, the presence of CVD or diabetes at baseline, BMI, estimated risk of CVD based on the Framingham equation and by tertile of non-HDL-C and log CRP. The p-value from a chi-squared test of heterogeneity is also presented.

**Coronary heart disease (fatal & non-fatal)**  
Odds ratio per minor allele - rs7529229

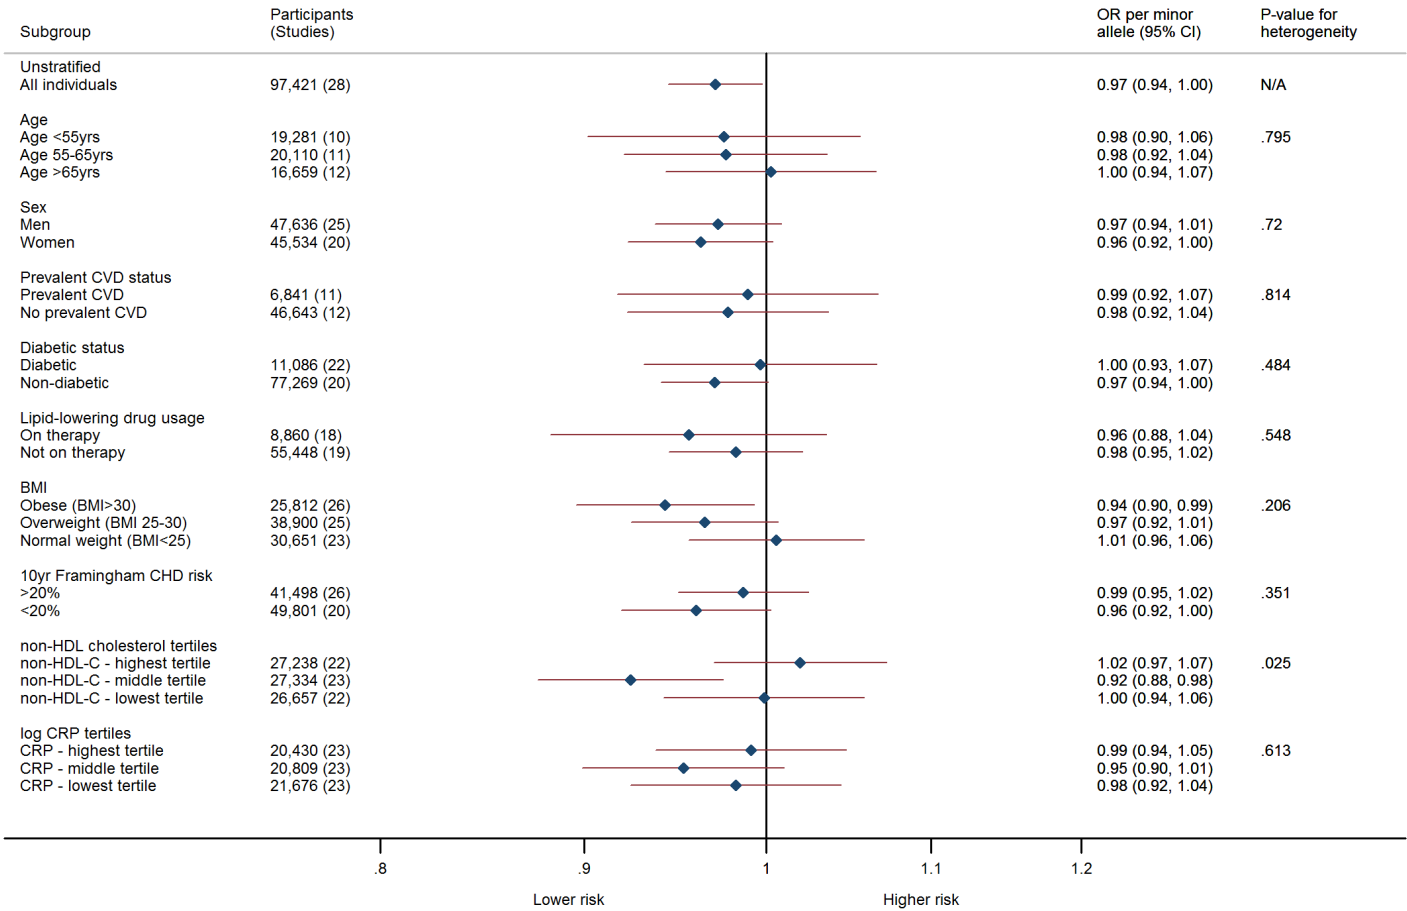

**Supplementary Figure 10 - Association of *IL6R* rs7529229 with risk of CHD (fatal & non-fatal) stratified by genotyping platform used in each study contributing to the analysis**

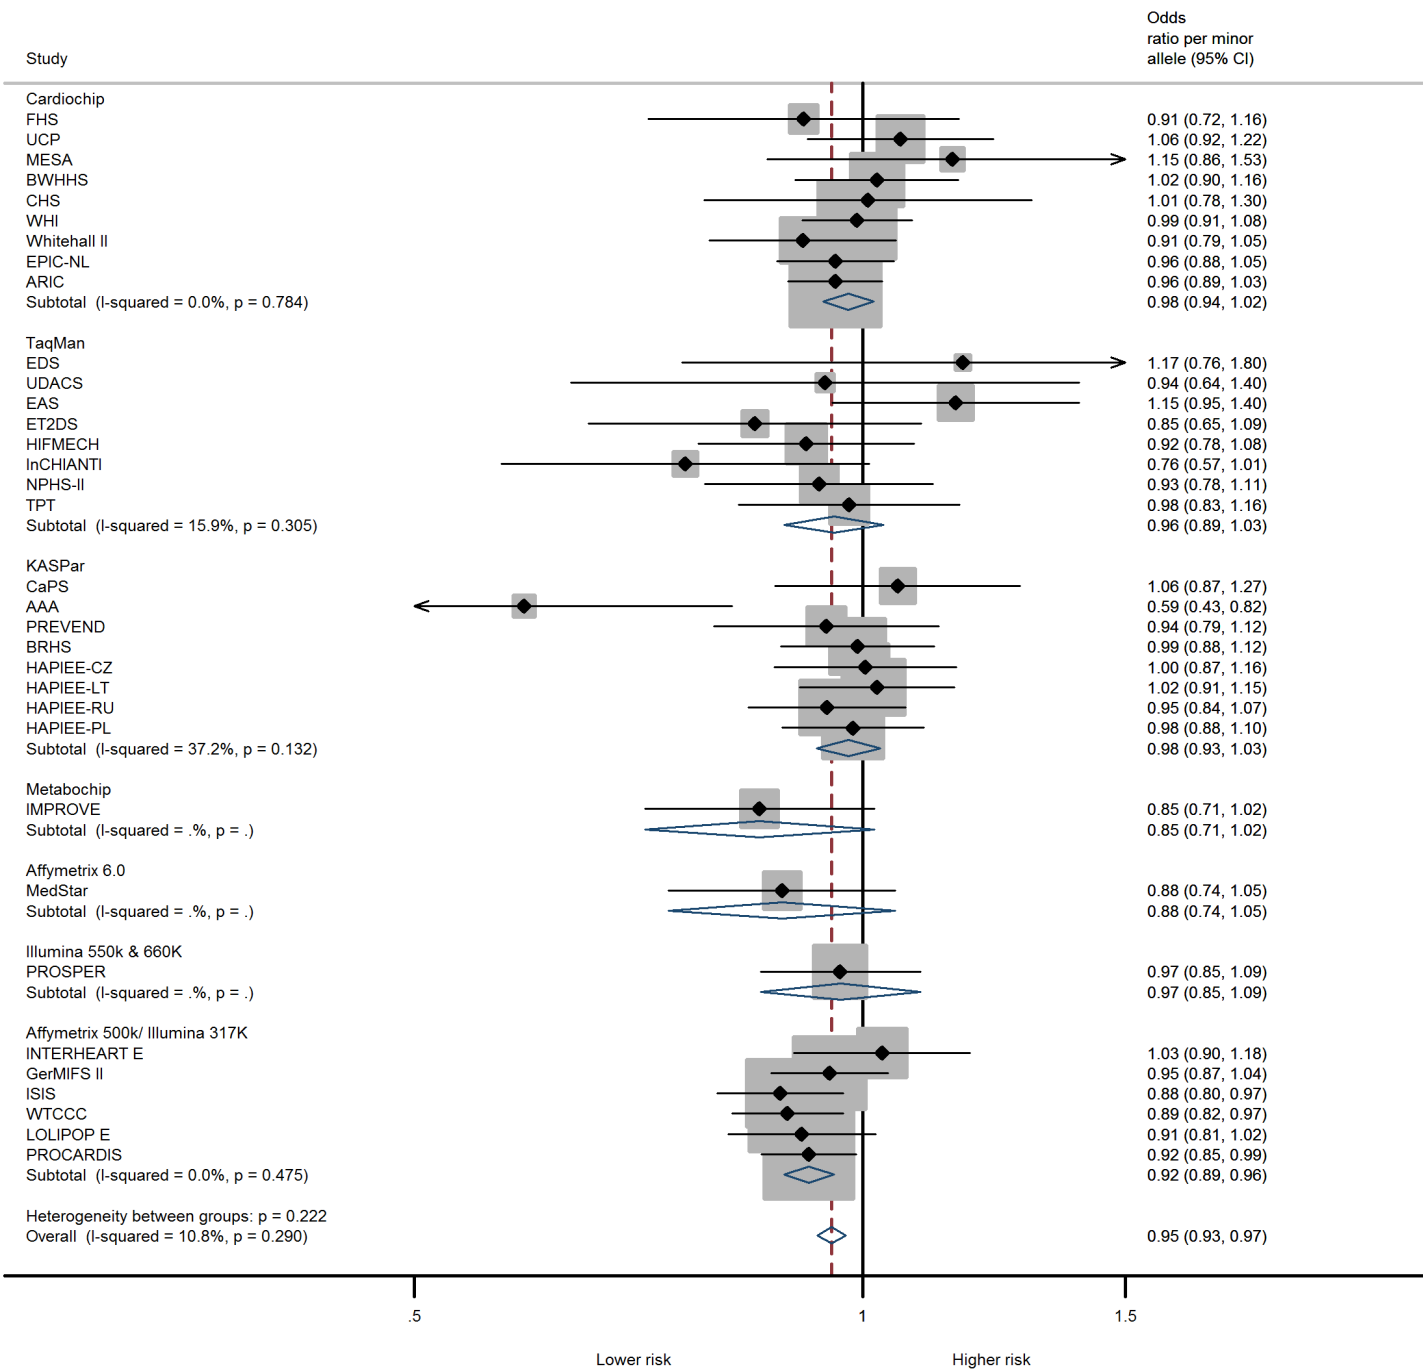

## Supplementary references

1. Walker, M., Whincup, P.H. & Shaper, A.G. The British Regional Heart Study 1975-2004. *Int J Epidemiol* **33**, 1185-1192 (2004).
2. Lawlor, D.A., Bedford, C., Taylor, M. & Ebrahim, S. Geographical variation in cardiovascular disease, risk factors, and their control in older women: British Women's Heart and Health Study. *J Epidemiol Community Health* **57**, 134-140 (2003).
3. Caerphilly and Speedwell Collaborative Group Caerphilly and Speedwell collaborative heart disease studies. The Caerphilly and Speedwell Collaborative Group. *J Epidemiol Community Health* **38**, 259-262 (1984).
4. Fowkes, F.G. *et al.* Edinburgh Artery Study: prevalence of asymptomatic and symptomatic peripheral arterial disease in the general population. *Int J Epidemiol* **20**, 384-392 (1991).
5. Gardener, E.A., Huppert, F.A., Guralnik, J.M. & Melzer, D. Middle-aged and mobility-limited: prevalence of disability and symptom attributions in a national survey. *J Gen Intern Med* **21**, 1091-1096 (2006).
6. Price, J.F. *et al.* The Edinburgh Type 2 Diabetes Study: study protocol. *BMC Endocr Disord* **8**, 18 (2008).
7. Miller, G.J. *et al.* The effects of quality and timing of venepuncture on markers of blood coagulation in healthy middle-aged men. *Thromb. Haemost* **73**, 82-86 (1995).
8. Marmot, M. & Brunner, E. Cohort Profile: the Whitehall II study. *Int J Epidemiol* **34**, 251-256 (2005).
9. Wadsworth, M., Kuh, D., Richards, M. & Hardy, R. Cohort Profile: The 1946 National Birth Cohort (MRC National Survey of Health and Development). *Int J Epidemiol* **35**, 49-54 (2006).
10. Musunuru, K. *et al.* Candidate gene association resource (CARE): design, methods, and proof of concept. *Circ Cardiovasc Genet* **3**, 267-275 (2010).
11. ARIC Investigators The Atherosclerosis Risk in Communities (ARIC) Study: design and objectives. The ARIC investigators. *Am. J. Epidemiol* **129**, 687-702 (1989).
12. Friedman, G.D. *et al.* CARDIA: study design, recruitment, and some characteristics of the examined subjects. *J Clin Epidemiol* **41**, 1105-1116 (1988).
13. Redline, S. *et al.* The familial aggregation of obstructive sleep apnea. *Am. J. Respir. Crit. Care Med* **151**, 682-687 (1995).
14. Buxbaum, S.G., Elston, R.C., Tishler, P.V. & Redline, S. Genetics of the apnea hypopnea index in Caucasians and African Americans: I. Segregation analysis. *Genet. Epidemiol* **22**, 243-253 (2002).
15. Fried, L.P. *et al.* The Cardiovascular Health Study: design and rationale. *Ann Epidemiol* **1**, 263-276 (1991).
16. DAWBER, T.R., MEADORS, G.F. & MOORE, F.E., Jr Epidemiological approaches to heart disease: the Framingham Study. *Am J Public Health Nations Health* **41**, 279-281 (1951).
17. Bild, D.E. *et al.* Multi-ethnic study of atherosclerosis: objectives and design. *Am. J. Epidemiol* **156**, 871-881 (2002).
18. Peasey, A. *et al.* Determinants of cardiovascular disease and other non-communicable diseases in Central and Eastern Europe: rationale and design of the HAPIEE study. *BMC Public Health* **6**, 255 (2006).
19. Williams, D.R. *et al.* Undiagnosed glucose intolerance in the community: the Isle of Ely Diabetes Project. *Diabet. Med* **12**, 30-35 (1995).
20. Medical Research Council MRC Fenland Study. *MRC Fenland Study* (2010).at <<http://www.mrc-epid.cam.ac.uk/Research/Studies/Fenland/index.html>>
21. Baldassarre, D. *et al.* Cross-sectional analysis of baseline data to identify the major determinants of carotid intima-media thickness in a European population: the IMPROVE study. *Eur. Heart J* **31**, 614-622 (2010).
22. Diercks, G.F. *et al.* Rationale, design, and baseline characteristics of a trial of prevention of cardiovascular and renal disease with fosinopril and pravastatin in nonhypertensive, nonhypercholesterolemic subjects with microalbuminuria (the Prevention of RENal and Vascular ENdstage Disease Intervention Trial [PREVEND IT]). *Am. J. Cardiol* **86**, 635-638 (2000).
23. Simons, P.C., Algra, A., van de Laak, M.F., Grobbee, D.E. & van der Graaf, Y. Second manifestations of ARTERial disease (SMART) study: rationale and design. *Eur. J. Epidemiol* **15**, 773-781 (1999).
24. Ferrucci, L. *et al.* Subsystems contributing to the decline in ability to walk: bridging the gap between epidemiology and geriatric practice in the InCHIANTI study. *J Am Geriatr Soc* **48**, 1618-1625 (2000).
25. Reilly, M.P. *et al.* Identification of ADAMTS7 as a novel locus for coronary atherosclerosis and association of ABO with myocardial infarction in the presence of coronary atherosclerosis: two genome-wide association studies. *The Lancet* **377**, 383-392 (2011).
26. Fowkes, F.G.R. *et al.* Aspirin for prevention of cardiovascular events in a general population screened for a low ankle brachial index: a randomized controlled trial. *JAMA* **303**, 841-848 (2010).
27. Shepherd, J. *et al.* The design of a prospective study of Pravastatin in the Elderly at Risk (PROSPER). PROSPER Study Group. PROspective Study of Pravastatin in the Elderly at Risk. *Am. J. Cardiol* **84**, 1192-1197 (1999).
28. MRC GPRF Thrombosis prevention trial: randomised trial of low-intensity oral anticoagulation with warfarin and low-dose aspirin in the primary prevention of ischaemic heart disease in men at increased risk. The Medical Research Council's General Practice Research Framework. *Lancet* **351**, 233-241 (1998).
29. Beulens, J.W.J. *et al.* Cohort profile: the EPIC-NL study. *Int J Epidemiol* **39**, 1170-1178 (2010).
30. Day, N. *et al.* EPIC-Norfolk: study design and characteristics of the cohort. European Prospective Investigation of Cancer. *Br. J. Cancer* **80 Suppl 1**, 95-103 (1999).
31. Peters, B.J.M. *et al.* Genetic variability within the cholesterol lowering pathway and the effectiveness of statins in reducing the risk of MI. *Atherosclerosis* **217**, 458-464 (2011).

32. Anderson, G.L. *et al.* Implementation of the Women's Health Initiative study design. *Ann Epidemiol* **13**, S5-17 (2003).
33. Tang, T.S. *et al.* Association between the rs1050450 glutathione peroxidase-1 (C > T) gene variant and peripheral neuropathy in two independent samples of subjects with diabetes mellitus. *Nutr Metab Cardiovasc Dis* (2010).doi:10.1016/j.numecd.2010.08.001
34. Dhamrait, S.S. *et al.* Cardiovascular risk in healthy men and markers of oxidative stress in diabetic men are associated with common variation in the gene for uncoupling protein 2. *Eur. Heart J* **25**, 468-475 (2004).
35. Mannila, M.N. *et al.* Plasma fibrinogen concentration predicts the risk of myocardial infarction differently in various parts of Europe: effects of beta-fibrinogen genotype and environmental factors. The HIFMECH Study. *Thromb. Haemost* **92**, 1240-1249 (2004).
36. Meschia, J.F. *et al.* The Ischemic Stroke Genetics Study (ISGS) Protocol. *BMC Neurol* **3**, 4 (2003).
37. Meschia, J.F. *et al.* The Siblings With Ischemic Stroke Study (SWISS) protocol. *BMC Med. Genet* **3**, 1 (2002).
38. Tomlinson, I. *et al.* A genome-wide association scan of tag SNPs identifies a susceptibility variant for colorectal cancer at 8q24.21. *Nat. Genet* **39**, 984-988 (2007).
39. Schunkert, H. *et al.* Repeated replication and a prospective meta-analysis of the association between chromosome 9p21.3 and coronary artery disease. *Circulation* **117**, 1675-1684 (2008).
40. Pare, G. *et al.* Genetic analysis of 103 candidate genes for coronary artery disease and associated phenotypes in a founder population reveals a new association between endothelin-1 and high-density lipoprotein cholesterol. *Am. J. Hum. Genet* **80**, 673-682 (2007).
41. ISIS Collaborative Group ISIS-3: a randomised comparison of streptokinase vs tissue plasminogen activator vs anistreplase and of aspirin plus heparin vs aspirin alone among 41,299 cases of suspected acute myocardial infarction. ISIS-3 (Third International Study of Infarct Survival) Collaborative Group. *Lancet* **339**, 753-770 (1992).
42. Clarke, R. *et al.* Lymphotoxin-alpha gene and risk of myocardial infarction in 6,928 cases and 2,712 controls in the ISIS case-control study. *PLoS Genet* **2**, e107 (2006).
43. Chambers, J.C. *et al.* Common genetic variation near MC4R is associated with waist circumference and insulin resistance. *Nat. Genet* **40**, 716-718 (2008).
44. Farrall, M. *et al.* Genome-wide mapping of susceptibility to coronary artery disease identifies a novel replicated locus on chromosome 17. *PLoS Genet* **2**, e72 (2006).
45. Samani, N.J. *et al.* Genomewide association analysis of coronary artery disease. *N. Engl. J. Med* **357**, 443-453 (2007).
46. Johnson, N. *et al.* Interaction between CHEK2\*1100delC and other low-penetrance breast-cancer susceptibility genes: a familial study. *Lancet* **366**, 1554-1557 (2005).
47. Stacey, S.N. *et al.* Common variants on chromosomes 2q35 and 16q12 confer susceptibility to estrogen receptor-positive breast cancer. *Nat. Genet* **39**, 865-869 (2007).
48. Power, C. & Elliott, J. Cohort profile: 1958 British birth cohort (National Child Development Study). *Int J Epidemiol* **35**, 34-41 (2006).
49. Fletcher, O. *et al.* Novel breast cancer susceptibility locus at 9q31.2: results of a genome-wide association study. *J. Natl. Cancer Inst* **103**, 425-435 (2011).
50. Friedewald, W.T., Levy, R.I. & Fredrickson, D.S. Estimation of the concentration of low-density lipoprotein cholesterol in plasma, without use of the preparative ultracentrifuge. *Clin. Chem* **18**, 499-502 (1972).
51. International HapMap Consortium The International HapMap Project. *Nature* **426**, 789-796 (2003).
52. Barrett, J.C., Fry, B., Maller, J. & Daly, M.J. Haploview: analysis and visualization of LD and haplotype maps. *Bioinformatics* **21**, 263-265 (2005).
53. Kent, W.J. *et al.* The human genome browser at UCSC. *Genome Res* **12**, 996-1006 (2002).
54. Keating, B.J. *et al.* Concept, design and implementation of a cardiovascular gene-centric 50 k SNP array for large-scale genomic association studies. *PLoS ONE* **3**, e3583 (2008).
55. Singh, J.A., Beg, S. & Lopez-Olivo, M.A. Tocilizumab for rheumatoid arthritis. *Cochrane Database Syst Rev* CD008331 (2010).doi:10.1002/14651858.CD008331.pub2
56. Elliott, P. *et al.* Genetic Loci associated with C-reactive protein levels and risk of coronary heart disease. *JAMA* **302**, 37-48 (2009).
57. Melzer, D. *et al.* A genome-wide association study identifies protein quantitative trait loci (pQTLs). *PLoS Genet* **4**, e1000072 (2008).
58. Kibriya, M.G. *et al.* A pilot genome-wide association study of early-onset breast cancer. *Breast Cancer Res. Treat* **114**, 463-477 (2009).
59. Heikkilä, K. *et al.* C-reactive protein-associated genetic variants and cancer risk: findings from FINRISK 1992, FINRISK 1997 and Health 2000 studies. *Eur. J. Cancer* **47**, 404-412 (2011).
60. Li, J. *et al.* A combined analysis of genome-wide association studies in breast cancer. *Breast Cancer Res. Treat* **126**, 717-727 (2011).
61. Rantala, A. *et al.* Association of IL-6 and IL-6R gene polymorphisms with susceptibility to respiratory tract infections in young Finnish men. *Hum. Immunol* **72**, 63-68 (2011).
62. Smolen, J.S. *et al.* Effect of interleukin-6 receptor inhibition with tocilizumab in patients with rheumatoid arthritis (OPTION study): a double-blind, placebo-controlled, randomised trial. *Lancet* **371**, 987-997 (2008).

63. Genovese, M.C. *et al.* Interleukin-6 receptor inhibition with tocilizumab reduces disease activity in rheumatoid arthritis with inadequate response to disease-modifying antirheumatic drugs: the tocilizumab in combination with traditional disease-modifying antirheumatic drug therapy study. *Arthritis Rheum* **58**, 2968-2980 (2008).
64. Emery, P. *et al.* IL-6 receptor inhibition with tocilizumab improves treatment outcomes in patients with rheumatoid arthritis refractory to anti-tumour necrosis factor biologicals: results from a 24-week multicentre randomised placebo-controlled trial. *Ann. Rheum. Dis* **67**, 1516-1523 (2008).
65. Kremer, J.L. *et al.* Tocilizumab inhibits structural joint damage in rheumatoid arthritis patients with inadequate responses to methotrexate at 1 year: The LITHE study. *Arthritis Rheum* (2010).doi:10.1002/art.30158

| Name                        | Affil 1                                                                                                                                                                     | Affil2                                                                                        | Affil 3 | Qualifications                       |
|-----------------------------|-----------------------------------------------------------------------------------------------------------------------------------------------------------------------------|-----------------------------------------------------------------------------------------------|---------|--------------------------------------|
| Fr Daniel I Swerdlow        | Research Department of Epidemiology and Public Health, University College London, London, UK                                                                                |                                                                                               |         | PhD                                  |
| Dr Michael V Holmes         | Research Department of Epidemiology and Public Health, University College London, London, UK                                                                                |                                                                                               |         | MSc DLSHTM MBBS                      |
| Ms Karoline B Kuchenbaecker | Egprtg'ht'Ecepgt'Genetic Epidemiology, Department of Public Health and Primary Care, Wpkxgtuksf 'qht'Cambridge.'Eco dtkf i g.'WM                                            |                                                                                               |         | MRCP<br>Dipl.-Psych., M.Sc.<br>Biom. |
| Mr Jorgen EL Engmann        | Research Department of Epidemiology and Public Health, University College London, London, UK                                                                                |                                                                                               |         | MSc BSc                              |
| Dr Tina Shah                | Research Department of Epidemiology and Public Health, University College London, London, UK                                                                                | Centre for Clinical Pharmacology, Division of Medicine, University College London, London, UK |         | PhD                                  |
| Dr Reecha Sofat             | Research Department of Epidemiology and Public Health, University College London, London, UK                                                                                | Centre for Clinical Pharmacology, Division of Medicine, University College London, London, UK |         | PhD                                  |
| Dr Yiran Guo                | Center for Applied Genomics, Abramson Research Center, The Children's Hospital of Philadelphia, Philadelphia, Pennsylvania 19104, USA                                       | "DI KUj gp j gp.'Dgkuj cp"t'pf vutkn\ qpg." [ cpkcp'F kntkv.'Uj gp j gp'73: 2: 5.'Ej kpc      |         | PhD                                  |
| Ms Christina Chung          | Research Department of Epidemiology and Public Health, University College London, London, UK                                                                                |                                                                                               |         | MSc                                  |
| Dr Anne Peasey              | Research Department of Epidemiology and Public Health, University College London, London, UK                                                                                |                                                                                               |         | PhD                                  |
| Dr Roman Pfister            | MRC Epidemiology Unit, Institute of Metabolic Science, University of Cambridge                                                                                              | Department III of Internal Medicine, University of Cologne, Cologne, Germany                  |         | MD                                   |
| Dr Simon P Mooijaart        | Department of Gerontology and Geriatrics , Leiden University Medical Center                                                                                                 |                                                                                               |         | MD, PhD                              |
| Dr Helen A Ireland          | Institute of Cardiovascular Science, UCL, London, UK                                                                                                                        |                                                                                               |         | PhD                                  |
| Mr Maarten Leusink          | Division of Pharmacoepidemiology and Clinical Pharmacology, Utrecht Institute for Pharmaceutical Sciences, Faculty of Science, Utrecht University, Utrecht, the Netherlands |                                                                                               |         | MSc                                  |
| Dr Claudia Langenberg       | MRC Epidemiology Unit, Institute of Metabolic Science, University of Cambridge                                                                                              |                                                                                               |         | MD PhD                               |
| Ms KaWah Li                 | Centre for Cardiovascular Genetics, Institute of Cardiovascular Science, University College London, 5 University Street, London WC1E 6JF, UK                                |                                                                                               |         | MSc                                  |
| Ms Jutta Palmen             | Centre for Cardiovascular Genetics, Institute of Cardiovascular Science, University College London, 5 University Street, London WC1E 6JF, UK                                |                                                                                               |         |                                      |
| Mr Philip Howard            | Centre for Cardiovascular Genetics, Institute of Cardiovascular Science, University College London, 5 University Street, London WC1E 6JF, UK                                |                                                                                               |         |                                      |
| Ms Jackie A Cooper          | Centre for Cardiovascular Genetics, Institute of Cardiovascular Science, University College London, 5 University Street, London WC1E 6JF, UK                                |                                                                                               |         | MSc                                  |
| Dr Fotios Drenos            | Centre for Cardiovascular Genetics, Institute of Cardiovascular Science, University College London, 5 University Street, London WC1E 6JF, UK                                |                                                                                               |         | PhD                                  |
| Professor John Hardy        | Reta Lila Weston Institute of Neurological Studies, Institute of Neurology, UCL, London, UK                                                                                 |                                                                                               |         | PhD, MD (Hon), DSc, FMedSci, FRS     |
| Dr Michael A Nalls          | National Institute on Aging, National Institutes of Health, Bethesda, MD 20892                                                                                              |                                                                                               |         | PhD                                  |
| Ms Yun Rose Li              | Center for Applied Genomics, Abramson Research Center, The Children's Hospital of Philadelphia, Philadelphia, Pennsylvania 19104, USA                                       |                                                                                               |         | BSc                                  |
| Professor Gordon Lowe       | Institute of Cardiovascular and Medical Sciences, University of Glasgow                                                                                                     |                                                                                               |         | DSc                                  |
| Dr Marlene Stewart          | University of Edinburgh                                                                                                                                                     |                                                                                               |         | PhD                                  |
| Dr Suzette J Bielinski      | Division of Epidemiology, Department of Health Sciences Research, Mayo Clinic, Harwick Building 6-56, 200 First Street South West, Rochester, MN, 55909, USA                |                                                                                               |         |                                      |
| Professor Julian Peto       | Department of non-communicable disease epidemiology, London School of Hygiene and Tropical Medicine, London WC1E 7HT                                                        |                                                                                               |         | DSc                                  |
| Dr Nicholas J Timpson       | MRC Centre for Causal Analyses in Translational Epidemiology, University of Bristol                                                                                         | School of Social and Community Medicine, University of Bristol                                |         | PhD                                  |

|                                   |                                                                                                                                                        |                         |
|-----------------------------------|--------------------------------------------------------------------------------------------------------------------------------------------------------|-------------------------|
| Dr John Gallacher                 | Department of Human Genetics, Western General Hospital, Edinburgh                                                                                      | MD, FRCS, FMedSci, FRSE |
| Professor Malcolm Dunlop          | MRC Human Genetics Unit, Western General Hospital, Edinburgh                                                                                           |                         |
| Professor Richard Houlston        | Section of Cancer Genetics, Institute of Cancer Research<br>Wellcome Trust Centre for Human Genetics and NIHR Comprehensive Biomedical Research Centre |                         |
| Professor Ian Tomlinson           |                                                                                                                                                        |                         |
|                                   | Department of Hygiene and Epidemiology, University of Ioannina Medical School, Ioannina, Greece                                                        |                         |
| Dr Ioanna Tzoulaki                | Department of Epidemiology and Biostatistics, Imperial College London, London, UK                                                                      | PhD                     |
| Dr Jian'an Luan                   | MRC Epidemiology Unit, Institute of Metabolic Science, University of Cambridge                                                                         | PhD                     |
| Dr Jolanda MA Boer                | National Institute for Public Health and the Environment, Bilthoven, the Netherlands                                                                   | PhD                     |
| Dr Nita G Forouhi                 | MRC Epidemiology Unit, Institute of Metabolic Science, Box 285, Addenbrooke's Hospital, Hills Road, Cambridge CB2 0QQ, UK                              | MRCGP, PhD, FFPH        |
| Dr N Charlotte Onland-Moret       | Julius Center for Health Sciences and Primary Care, University Medical Center, Utrecht, Utrecht, The Netherlands                                       |                         |
| Professor Yvonne T van der Schouw | Julius Center for Health Sciences and Primary Care, University Medical Center, Utrecht, Utrecht, The Netherlands                                       |                         |
| Dr Renate Schnabel                | University Heart Center Hamburg, Department of General and Interventional Cardiology, Hamburg, Germany                                                 | MD, MSc                 |
| Dr Jaroslav C Hubacek             | Institute for Clinical and Experimental Medicine, Prague, Czech Republic                                                                               | PhD, FUE                |
| Dr Ruzena Kubinova                | Department of Environmental Health Monitoring System, National Institute of Public Health, Prague, Czech Republic                                      | MD                      |
| Dr Migle Baceviciene              | Lithuanian University of Health Sciences, Kaunas, Lithuania                                                                                            | MD, PhD                 |
| Professor Abdonas Tamosiunas      | Lithuanian University of Health Sciences, Kaunas, Lithuania                                                                                            | MD                      |
| Prof Andrzej Pajak                | Institute of Public Health, Jagiellonian University Medical College, Krakow, Poland                                                                    | MD, PhD                 |
| Dr Roman Topor-Madry              | Institute of Public Health, Jagiellonian University Medical College, Krakow, Poland                                                                    | MD, PhD                 |
| Professor Sofia Malyutina         | Institute of Internal Medicine SB RAMS, Novosibirsk, Russia                                                                                            | MD, PhD                 |
| Dr Damiano Baldassarre            | Department of Pharmacological Sciences, University of Milan, Monzino Cardiology Center, IRCCS, Milan Italy                                             | PhD                     |
| Dr Bengt Sennblad                 | Atherosclerosis Research Unit, Department of Medicine Solna, Karolinska Institutet, Stockholm, Sweden                                                  | PhD                     |
| Professor Elena Tremoli           | Department of Pharmacological Sciences, University of Milan, Monzino Cardiology Center, IRCCS, Milan Italy                                             | PhD                     |
| Professor Ulf de Faire            | Division of Cardiovascular Epidemiology, Institute of Environmental Medicine, Karolinska Institutet, Stockholm, Sweden                                 | MD PhD                  |
| Dr Luigi Ferrucci                 | National Institute on Aging, Clinical Research Branch, Harbor Hospital, Hanover Street, Baltimore, MD, USA                                             | MD, PhD                 |
| Dr Stefania Bandenelli            | Florence Local Health Agency (ASF-Firenze), Florence, Italy                                                                                            | MD                      |
| Dr Toshiko Tanaka                 | National Institute on Aging, Clinical Research Branch, Harbor Hospital, Hanover Street, Baltimore, MD, USA                                             | PhD                     |
| Dr James F Meschia                | Department of Neurology, Mayo Clinic                                                                                                                   | MD                      |
| Dr Andrew Singleton               | National Institute on Aging, National Institutes of Health, Bethesda, MD 20892                                                                         | PhD                     |
| Professor Gerjan Navis            | Department of Internal Medicine University Medical Center Groningen, University of Groningen, Groningen, The Netherlands                               | MD, PhD                 |
| Dr Irene Mateo Leach              | Department of Cardiology, University Medical Center Groningen, University of Groningen, Groningen, The Netherlands                                     | PhD                     |

|                                    |                                                                                                                                                                             |                                                                |               |
|------------------------------------|-----------------------------------------------------------------------------------------------------------------------------------------------------------------------------|----------------------------------------------------------------|---------------|
| Dr Stephan JL Bakker               | Department of Internal Medicine University Medical Center Groningen, University of Groningen, Groningen, The Netherlands                                                    |                                                                | MD, PhD       |
| Dr Ron T Gansevoort                | Department of Nephrology, University Medical Center Groningen, University of Groningen, Groningen, The Netherlands                                                          |                                                                | MD, PhD       |
| Professor Ian Ford                 | Centre for Biostatistics, University of Glasgow                                                                                                                             |                                                                | DSc           |
| Dr. Stephen E Epstein              | Cardiovascular Research Institute, MedStar Health Research Institute, Washington Hospital Center, Washington, DC, USA                                                       |                                                                | MD            |
| Dr. Mary Susan Burnett             | Cardiovascular Research Institute, MedStar Health Research Institute, Washington Hospital Center, Washington, DC, USA                                                       |                                                                | PhD           |
| Dr. Joe M Devaney                  | Cardiovascular Research Institute, MedStar Health Research Institute, Washington Hospital Center, Washington, DC, USA                                                       |                                                                | PhD           |
| Professor J Wouter Jukema          | Dept of Cardiology C5-P<br>Leiden University Medical Center                                                                                                                 |                                                                | FACC          |
| Professor Rudi GJ Westendorp       | Department of Gerontology and Geriatrics , Leiden University Medical Center, The Netherlands                                                                                |                                                                | MD, PhD       |
| Dr Gert Jan de Borst               | Department of Vascular Surgery, University Medical Center Utrecht, Utrecht, The Netherlands                                                                                 |                                                                | MD, PhD       |
| Professor Yolanda van der Graaf    | Julius Center for Health Sciences and Primary Care, University Medical Center Utrecht, Utrecht, The Netherlands                                                             |                                                                | MD, PhD       |
| Dr Pim A de Jong                   | Department of Radiology, University Medical Center Utrecht, Utrecht, The Netherlands                                                                                        |                                                                | MD, PhD       |
| Dr Anke-Hilse Maitland-van der Zee | Division of Pharmacoepidemiology and Clinical Pharmacology, Utrecht Institute for Pharmaceutical Sciences, Faculty of Science, Utrecht University, Utrecht, the Netherlands |                                                                | PharmD, PhD   |
| Dr Olaf H Klungel                  | Division of Pharmacoepidemiology and Clinical Pharmacology, Utrecht Institute for Pharmaceutical Sciences, Faculty of Science, Utrecht University, Utrecht, the Netherlands |                                                                | PharmD, PhD   |
| Professor Anthonius de Boer        | Division of Pharmacoepidemiology and Clinical Pharmacology, Utrecht Institute for Pharmaceutical Sciences, Faculty of Science, Utrecht University, Utrecht, the Netherlands |                                                                | MD, PhD       |
| Professor Pieter A Doevendans      | Department of Cardiology, Division Heart and Lungs , University Medical Centre Utrecht, Utrecht, The Netherlands                                                            |                                                                | MD, PhD       |
| Dr Jeffrey W Stephens              | College of Medicine, Swansea University, Swansea SA2 8PP                                                                                                                    |                                                                | MB, PhD, FRCP |
| Professor Charles B Eaton          | Memorial Hospital of Rhode Island                                                                                                                                           | Brown University                                               | MD, MS        |
| Professor Jennifer G Robinson      | University of Iowa                                                                                                                                                          |                                                                | MD, MPH       |
| Professor JoAnn E Manson           | Division of Preventive Medicine, Brigham and Women's Hospital                                                                                                               |                                                                | MD, DrPH      |
| Professor F Gerry R Fowkes         | University of Edinburgh                                                                                                                                                     |                                                                | PhD, FRCPE    |
| Professor Timothy M Frayling       | Peninsula College of Medicine and Dentistry, University of Exeter, Exeter, UK                                                                                               |                                                                | PhD           |
| Dr Jackie Price                    | Egptg'ht'Rqr wvqp'J gcnj 'Uelqegu'University of Edinburgh.'Gflpdti j .'WM'                                                                                                  |                                                                | OD, FFPH      |
| Professor Peter H Whincup          | St George's. University of London                                                                                                                                           |                                                                | PhD, HTER     |
| Professor Richard W Morris         | Department of Primary Care & Population Health, UCL, London, UK                                                                                                             |                                                                | PhD           |
| Professor Debbie A Lawlor          | MRC Centre for Causal Analyses in Translational Epidemiology, University of Bristol                                                                                         | School of Social and Community Medicine, University of Bristol | PhD           |
| Professor George Davey Smith       | MRC Centre for Causal Analyses in Translational Epidemiology, University of Bristol                                                                                         | School of Social and Community Medicine, University of Bristol |               |
| Professor Yoav Ben-Shlomo          | School of Social and Community Medicine, University of Bristol                                                                                                              |                                                                | MB BS, PhD    |
| Professor Susan Redline            | Harvard Medical School, Brigham and Women's Hospital, 221 Longwood Ave Boston MA 02115                                                                                      |                                                                | MD, MPH       |
| Dr Leslie A Lange                  | Department of Genetics, University of North Carolina School of Medicine at Chapel Hill, Chapel Hill, North Carolina 27514, USA                                              |                                                                |               |



|                                |                                                                                                                                              |                                                                                                                  |                |
|--------------------------------|----------------------------------------------------------------------------------------------------------------------------------------------|------------------------------------------------------------------------------------------------------------------|----------------|
| Dr Meena Kumari                | Research Department of Epidemiology and Public Health, University College London, London, UK                                                 |                                                                                                                  | PhD            |
| Professor Nick J Wareham       | MRC Epidemiology Unit, Institute of Metabolic Science, University of Cambridge                                                               |                                                                                                                  |                |
| Dr W M Monique Verschuren      | National Institute for Public Health and the Environment, Bilthoven, the Netherlands                                                         |                                                                                                                  |                |
| Professor Emelia J Benjamin    | Boston University Schools of Medicine and Public Health, Boston, MA.                                                                         |                                                                                                                  |                |
| Professor John C Whittaker     | GlaxoSmithKline                                                                                                                              | Faculty of Epidemiology and Population Health, London School of Hygiene and Tropical Medicine                    | RJ F           |
| Professor Anders Hamsten       | Atherosclerosis Research Unit, Department of Medicine Solna, Karolinska Institutet, Stockholm, Sweden                                        |                                                                                                                  | MD PhD FRCP    |
| Dr Frank Dudbridge             | Faculty of Epidemiology and Population Health, London School of Hygiene and Tropical Medicine                                                |                                                                                                                  | PhD            |
| Dr JA Chris Delaney            | Department of Pharmaceutical Outcomes & Policy, College of Pharmacy, University of Florida, Gainesville, FL 32610-0496, USA                  |                                                                                                                  |                |
| Dr Andrew Wong                 | MRC Unit for Lifelong Health & Ageing, London, UK                                                                                            |                                                                                                                  | PhD            |
| Professor Diana Kuh            | MRC Unit for Lifelong Health & Ageing, London, UK                                                                                            |                                                                                                                  | PhD, FFPH      |
| Dr Rebecca Hardy               | MRC Unit for Lifelong Health & Ageing, London, UK                                                                                            |                                                                                                                  | PhD            |
| Dr Berta Almqvist              | Center for Applied Genomics, Abramson Research Center, The Children's Hospital of Philadelphia, Philadelphia, Pennsylvania 19104, USA        |                                                                                                                  |                |
| Dr John J Connolly             | Center for Applied Genomics, Abramson Research Center, The Children's Hospital of Philadelphia, Philadelphia, Pennsylvania 19104, USA        | Department of Genetics, University Medical Center Groningen, University of Groningen, Groningen, The Netherlands | MD, PhD        |
| Dr Pim van der Harst           | Department of Cardiology, University Medical Center Groningen, University of Groningen, Groningen, The Netherlands                           |                                                                                                                  |                |
| Dr Eric J Brunner              | Research Department of Epidemiology and Public Health, University College London, London, UK                                                 |                                                                                                                  |                |
| Professor Sir Michael G Marmot | Research Department of Epidemiology and Public Health, University College London, London, UK                                                 |                                                                                                                  | FRCP           |
| Professor Christina L Wassel   | University of California - San Diego, Department of Family and Preventive Medicine                                                           |                                                                                                                  | PhD            |
| Professor Steve E Humphries    | Centre for Cardiovascular Genetics, Institute of Cardiovascular Science, University College London, 5 University Street, London WC1E 6JF, UK |                                                                                                                  | PhD MRCP FAMS  |
| Professor Philippa J Talmud    | Centre for Cardiovascular Genetics, Institute of Cardiovascular Science, University College London, 5 University Street, London WC1E 6JF, UK |                                                                                                                  | PhD, DSc, MRCP |
| Professor Mika Kivimaki        | Research Department of Epidemiology and Public Health, University College London, London, UK                                                 |                                                                                                                  | PhD            |
| Fr Folkert W Asselbergs        | Department of Cardiology, Division Heart and Lungs, University Medical Center Utrecht, Utrecht, The Netherlands                              | Julius Center for Health Sciences and Primary Care, University Medical Center Utrecht, The Netherlands           | MD PhD         |
| Professor Mikhail Voevoda      | Institute of Internal Medicine SB RAMS, Novosibirsk, Russia                                                                                  | Department of Medical Genetics, Biomedical Genetics, University Medical Center, Utrecht, The Netherlands         | MD, PhD        |
| Professor Martin Bobak         | Research Department of Epidemiology and Public Health, University College London, London, UK                                                 |                                                                                                                  | MD, PhD        |
| Dr Hynek Pikhart               | Research Department of Epidemiology and Public Health, University College London, London, UK                                                 |                                                                                                                  | PhD            |
| Professor James G Wilson       | Department of Physiology and Biophysics, University of Mississippi Medical Center, Jackson, MS 39216 USA                                     |                                                                                                                  |                |
| Professor Hakon Hakonarson     | Center for Applied Genomics, Abramson Research Center, The Children's Hospital of Philadelphia, Philadelphia, Pennsylvania 19104, USA        |                                                                                                                  |                |

|                              |                                                                                                                                       |                                                                                                              |        |
|------------------------------|---------------------------------------------------------------------------------------------------------------------------------------|--------------------------------------------------------------------------------------------------------------|--------|
| Professor Alex P Reiner      | Division of Public Health Sciences, Fred Hutchinson Cancer Research Center, Seattle, Washington                                       |                                                                                                              | MD, MS |
| Dr Brendan J Keating         | Center for Applied Genomics, Abramson Research Center, The Children's Hospital of Philadelphia, Philadelphia, Pennsylvania 19104, USA |                                                                                                              | PhD    |
| Professor Naveed Sattar      | Institute of Cardiovascular & Medical Sciences, University of Glasgow                                                                 |                                                                                                              | FRCP   |
| Professor Aroon D Hingorani* | Research Department of Epidemiology and Public Health, University College London, London, UK                                          |                                                                                                              | FRCP   |
| Dr Juan Pablo Casas*         | Research Department of Epidemiology and Public Health, University College London, London, UK                                          | Department of Epidemiology and Population Health, London School of Hygiene and Tropical Medicine, London, UK | PhD    |

**\*Joint senior authors**
